Phase-based cortical synchrony is affected by prematurity

1 ***Phase-based cortical synchrony is affected by prematurity***

2

3 Pauliina Yrjölä, Susanna Stjerna, Matias Palva, Sampsa Vanhatalo\* & Anton Tokariev\*

4 \* These authors contributed equally

5

6 Author details

7 1. Pauliina Yrjölä (corresponding author)

8 1. BABA center, Department of Clinical Neurophysiology, Childrens' Hospital,  
9 Helsinki University Hospital and University of Helsinki, Helsinki, Finland

10 2. Department of Neuroscience and Biomedical Engineering, Aalto University,  
11 Helsinki, Finland

12 3. Neuroscience center, Helsinki Institute of Life Science, University of Helsinki,  
13 Helsinki, Finland

14 Correspondence

15 BABA center, Childrens' Hospital

16 Helsinki University Hospital

17 P.O.Box 281, Stenbäckinkatu 11, 00029 HUS, Helsinki, Finland.

18 Email: pauliina.yrjola@aalto.fi

19 Competing interests

20 The author declares that no competing interests exist.

21 2. Susanna Stjerna

22 1. BABA center, Department of Clinical Neurophysiology, Childrens' Hospital,  
23 Helsinki University Hospital and University of Helsinki, Helsinki, Finland

24 2. Neuroscience center, Helsinki Institute of Life Science, University of Helsinki,  
25 Helsinki, Finland

26 Competing interests

27 The author declares that no competing interests exist.

28 3. J. Matias Palva

29 1. Department of Neuroscience and Biomedical Engineering, Aalto University,  
30 Helsinki, Finland

31 2. Neuroscience center, Helsinki Institute of Life Science, University of Helsinki,  
32 Helsinki, Finland

33 3. Centre for Cognitive Neuroimaging, Institute of Neuroscience and  
34 Psychology, University of Glasgow, United Kingdom

35 Competing interests

36 The author declares that no competing interests exist.

37 4. Sampsa Vanhatalo

## Phase-based cortical synchrony is affected by prematurity

- 38           1. BABA center, Department of Clinical Neurophysiology, Childrens' Hospital,  
39           Helsinki University Hospital and University of Helsinki, Helsinki, Finland  
40           2. Neuroscience center, Helsinki Institute of Life Science, University of Helsinki,  
41           Helsinki, Finland

### 42           Competing interests

43           The author declares that no competing interests exist.

### 44           5. Anton Tokariev (corresponding author)

- 45           1. BABA center, Department of Clinical Neurophysiology, Childrens' Hospital,  
46           Helsinki University Hospital and University of Helsinki, Helsinki, Finland  
47           2. Neuroscience center, Helsinki Institute of Life Science, University of Helsinki,  
48           Helsinki, Finland

### 49           Correspondence

50           BABA center, Childrens' Hospital  
51           Helsinki University Hospital  
52           P.O.Box 281, Stenbäckinkatu 11, 00029 HUS, Helsinki, Finland.  
53           Email: [anton.tokariev@helsinki.fi](mailto:anton.tokariev@helsinki.fi)

### 54           Competing interests

55           The author declares that no competing interests exist.

56

57

58

59           Acknowledgements: This work was supported by the Finnish Pediatric Foundation, the Finnish  
60           Academy (313242, 288220, 321235), Juselius Foundation, Aivosäätiö, Neuroscience Center  
61           at University of Helsinki, as well as Helsinki University Central Hospital

## Phase-based cortical synchrony is affected by prematurity

### 62 **Abstract**

63 Inter-areal synchronization by phase-phase correlations (PPC) of cortical oscillations  
64 mediates many higher neurocognitive functions, which are often affected by prematurity, a  
65 globally prominent neurodevelopmental risk factor. Here, we used electroencephalography  
66 (EEG) to examine brain-wide cortical PPC networks at term-equivalent age, comparing human  
67 infants after early prematurity to a cohort of healthy controls. We found that prematurity  
68 affected these networks in a sleep state-specific manner, and the differences between groups  
69 were also frequency-selective, involving brain-wide connections. The strength of  
70 synchronization in these networks was predictive of clinical outcomes in the preterm infants.  
71 These findings show that prematurity affects PPC networks in a clinically significant manner  
72 suggesting early functional biomarkers of later neurodevelopmental compromise to be used  
73 in clinical and translational studies after early neonatal adversity.

74

75 Keywords: neonatal EEG, brain networks, NICU, brain monitoring, preterm infant,  
76 neurodevelopment, phase coupling, intrinsic coupling modes

## Phase-based cortical synchrony is affected by prematurity

### 77 **Introduction**

78 Approximately 10% of infants are born preterm, which inflicts lifelong disabilities in many key  
79 brain functions, including vision, learning, and language processing (Johnson & Marlow, 2017;  
80 WHO, 2012). Many of these functional abnormalities arise from the impacts that prematurity  
81 has on neuronal networks. Recent studies have demonstrated both structural (Batalle et al.,  
82 2017; Guo et al., 2017) and functional (Tokariev et al., 2019a; Tokariev et al., 2019b; Tóth et  
83 al., 2017) effects of prematurity, some of which are shown to predict later neurodevelopmental  
84 outcomes.

85

86 Prematurity implies that the infants spend a part or all of their third trimester of gestation in an  
87 unnatural environment, *ex utero*. This time window is known to be characterized by the growth  
88 of brain networks driven by a combination of genetic and activity-dependent mechanisms  
89 (Luhmann et al., 2016; Molnár et al., 2020). The early cortical activity can be recorded with  
90 scalp electroencephalography (EEG) and consists of spontaneous intermittent bursts, which  
91 provide an early mechanism for inter-areal temporal correlations and define functional cortical  
92 networks (Vanhatalo & Kaila, 2006). Therefore, the early cortical activity is a driver, guide, and  
93 biomarker of the development of brain networks.

94

95 The functional cortical networks can be characterized by quantifying relationships between  
96 phase or amplitude attributes of neural signals from distinct brain regions. Prior research on  
97 neonatal EEG (Omidvarnia et al., 2014; Tokariev et al., 2019a; Tokariev et al., 2019b) have  
98 often focused on the amplitude–amplitude correlations (AACs) that reflect co-modulation of  
99 overall neuronal activity and gross cortical excitability over periods of seconds (Engel et al.,  
100 2013; Hipp et al., 2012; Palva & Palva, 2011; Tewarie et al., 2019). The other commonly used  
101 measure of neuronal interactions is phase–phase correlation (PPC) that is considered to  
102 reflect a spatiotemporally accurate mechanism of inter-areal communication. PPC is thought  
103 to arise from subsecond timing relationships in neuronal spiking (Palva & Palva, 2011;

## Phase-based cortical synchrony is affected by prematurity

104 Vidaurre et al., 2018; Womelsdorf et al., 2007), hence being able to support dynamic  
105 integration in neuronal ensembles underlying several higher-level brain functions (Bressler &  
106 Menon, 2010; Palva & Palva, 2011). Moreover, it is now well known that the brain operates  
107 concurrently at multiple frequencies, giving rise to multiplex networks shaped by concerted  
108 actions of different coupling mechanisms in several frequency bands (De Domenico et al.,  
109 2016; Siebenhühner et al., 2016).

110

111 Our recent study suggests that PPC networks link to neurological performance (Tokariev et  
112 al., 2019b). However, the spatial and spectral extent of these findings, as well as their clinical  
113 correlates have remained unclear. Here, we aimed to assess how the large-scale cortical PPC  
114 networks are affected by preterm birth of human infants. We analysed EEG recordings from a  
115 large cohort of preterm and healthy control infants using an infant-specific source modelling-  
116 based analysis pipeline that allows non-invasive assessment of functional networks at the  
117 level of cortical sources. We asked whether prematurity leads to changes in the cortical  
118 networks that are linked to sleep state, brain area or oscillation frequency. Moreover, we  
119 wanted to study if prematurity-related changes in cortical networks would have clinical  
120 significance, i.e., be predictive of clinical neurological performance of the infants by the time  
121 of recording and/or later during childhood.

## Phase-based cortical synchrony is affected by prematurity

### 122 **Results**

123 To characterize effects of prematurity on early cortical networks, we recorded multichannel  
124 scalp EEG at term-equivalent age from a group of infants born extremely preterm (EP, N =  
125 46), as well as from a group of full-term healthy controls (HC, N = 67). The PPC cortical  
126 networks were computed from source-reconstructed EEG data for active (AS) and quiet sleep  
127 (QS) within 21 narrow frequency bands covering the physiologically relevant range of 0.4–22  
128 Hz (Vanhatalo et al., 2005). To evaluate the impact of prematurity on cortical networks as a  
129 function of frequency, we estimated the extent of significant network differences between EP  
130 and HC groups at each specific frequency. Finally, to define patterns which are linked to infant  
131 neurological performance, we correlated the PPC networks of the EP group to key  
132 neurological scores at term age and neurocognitive assessments at two years of age. We  
133 described the extent of patterns that are different between groups or correlate to outcomes as  
134 a fraction of statistically significant connections ( $K$ ) relative to the whole network (Palva et al.,  
135 2010). The overall analytical flow is shown on Figure 1 and described in detail in the *Methods*  
136 section.

137

Phase-based cortical synchrony is affected by prematurity

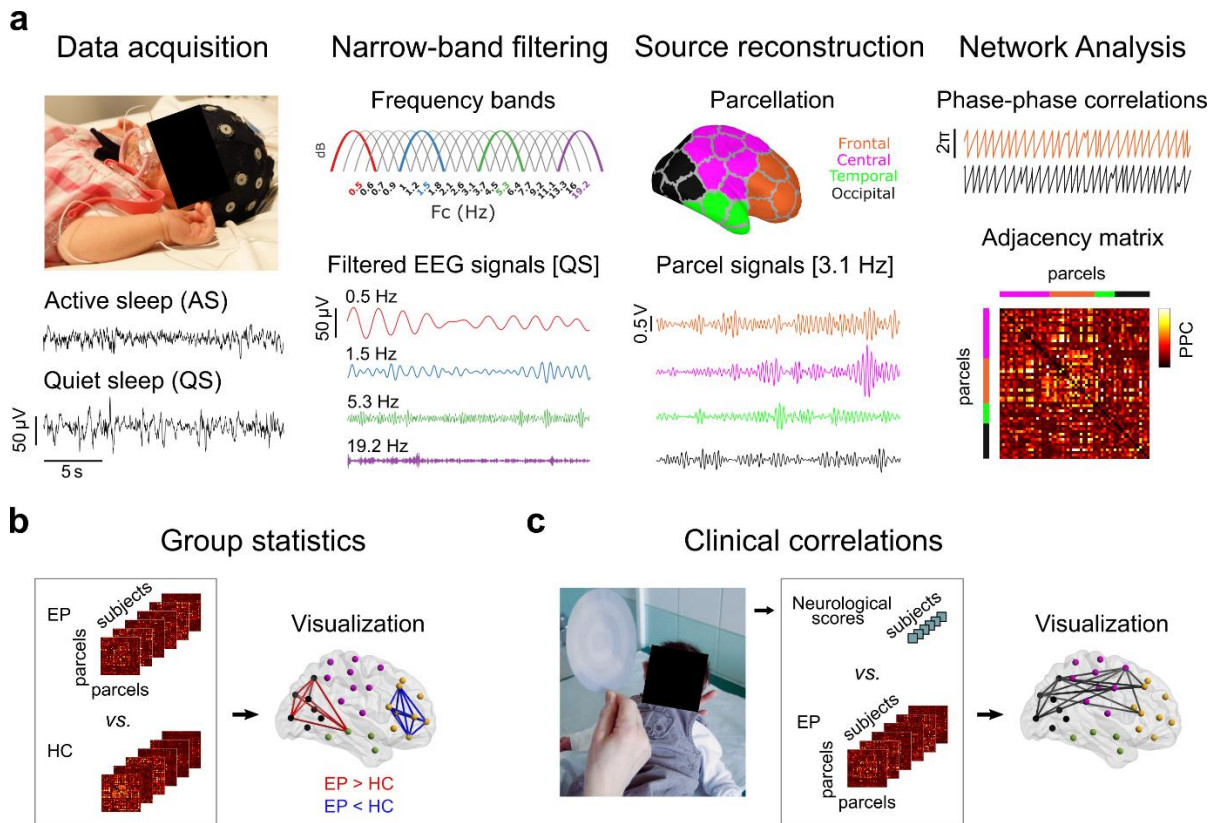

138

139

140 Figure 1. **Outline of the study design and analyses. (a)** EEG recordings of day-time sleep

141 were acquired from early preterm (EP) and healthy control (HC) cohorts. The recordings were

142 classified into active (AS) and quiet sleep (QS), and 5-minute-long epochs were constructed

143 for both sleep states. The selected epochs were filtered into 21 narrow frequency bands of

144 semi-equal length on a logarithmic scale and converted to cortical source signals applying a

145 realistic infant head model with 58 cortical parcels. Functional connectivity analysis was

146 applied on the parcel signals by computing phase-phase correlations (PPCs) with the

147 debiased phase lag index, yielding subject-specific connectivity matrices for both sleep states

148 and all frequency bands. **(b)** Statistical group differences in connectivity strength were

149 computed (Wilcoxon rank sum test) for both sleep states and each frequency band. The edges

150 portraying significant differences for two contrasts EP > HC (red) and EP < HC (blue) were

151 then visualized. **(c)** Finally, correlations of PPC strengths to newborn neurological and 2-year

152 neurocognitive assessment scores were investigated (Spearman correlation). The edges

153 related to significant clinical correlation were visualized.

## Phase-based cortical synchrony is affected by prematurity

### 154 **PPC networks are affected by prematurity in a frequency-specific manner**

155 We found broad sleep- and frequency- specific differences in PPC networks between EP and  
156 HC infants (Figure 2). During AS, the most extensive group differences were observed within  
157 the theta frequency band (peak at  $F_c = 5.3$  Hz; Figure 2a) with stronger connections in the EP  
158 group ( $K = 10\%$ ,  $p < 0.01$ ,  $q = 0.01$ ) that were uniformly distributed over the whole cortex  
159 (Figure 2b) and preferentially long-range. Smaller subnetworks ( $K = 2\text{--}4\%$ ,  $p < 0.01$ ,  $q = 0.01$ )  
160 of both increased and decreased connectivity in EP infants were at delta frequencies (1.8–3.1  
161 Hz) covering central and temporal regions. During QS, the most prominent group differences  
162 were within the delta band: The EP infants exhibited stronger connectivity ( $K = 10\%$  at 1.8 Hz,  
163  $p < 0.01$ ,  $q = 0.01$ ) in mostly long-range connections between frontal and occipital lobes, while  
164 there were weaker short-range connections ( $K = 8\%$  at 1.2 Hz,  $p < 0.01$ ,  $q = 0.01$ ) within the  
165 frontal lobe and a few projections to the parietal lobe. Networks at alpha and beta frequencies  
166 were suppressed in the EP infants during both sleep states, and they mainly involved basal  
167 connections linking occipital cortices to frontal and temporal areas.

168  
169 No significant correlations (Spearman, two-tailed test,  $\alpha = 0.05$ , Benjamini-Hochberg  
170 correction) were found between mean connectivity strength and age per frequency. Effect  
171 sizes, computed by the rank-biserial correlation over each significant network, are presented  
172 in Figure 2—figure supplement 1. The spatial differences in PPC networks between groups  
173 for all frequency bands are shown at Figure 2—figure supplement 2. We also validated the  
174 results with an alternative analysis using network-based statistics (NBS), (Zalesky et al.,  
175 2010), with two one-tailed tests (for details, see *Methods*), and we found strikingly similar  
176 spectral and spatial patterns in group comparisons (Figure 2—figure supplement 3). The  
177 findings together suggest that exposure to prematurity affects the organization of cortical PPC  
178 networks at limited oscillatory frequencies.

179



## Phase-based cortical synchrony is affected by prematurity

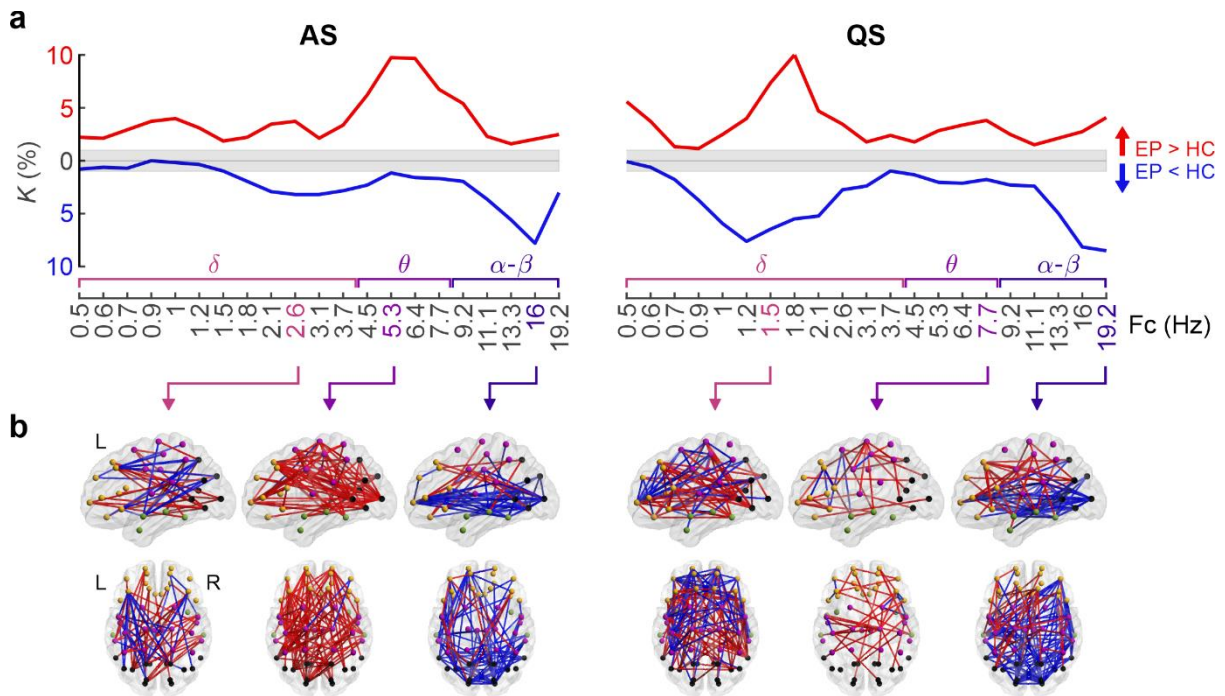

180

181

182 **Figure 2. Effects of prematurity on cortical PPC networks. (a)** Network density ( $K$ ) of  
183 significant PPC group differences (two one-tailed Wilcoxon rank-sum tests,  $\alpha = 0.01$ ) during  
184 active sleep (AS, left) and quiet sleep (QS, right) as a function of frequency. Networks that are  
185 stronger in EP (EP > HC) are shown in red, whereas networks with suppressed connectivity  
186 in EP (EP < HC) are presented in blue. The grey shaded area depicts the boundaries of the  
187  $q$ -level showing the potential level of false discoveries ( $q = 0.01$ ). The data presented in the  
188 figure is provided in Figure 2—source data 1 and matrices of the  $p$ -values and effect sizes of  
189 all networks in Figure 2—source data 2. **(b)** Spatial visualizations present PPC network  
190 comparisons at the frequencies with the most extensive group differences. The color coding  
191 of the networks (red, blue) is equal to that of (a).

192

### 193 **Connectivity strength correlates with neurological performance in preterm infants**

194 Next, we studied how the strength of cortical PPC networks correlates to neurological  
195 performance at the time of newborn EEG recordings. To this end, we correlated the  
196 connectivity strengths of each PPC network connection ( $N = 1128$ ) of the EP group to the  
197 neurological performance of the corresponding infants, assessed using compound scores C1

## Phase-based cortical synchrony is affected by prematurity

198 and C2, which are associated with later motor and cognitive outcomes, respectively (Tokariev  
199 et al., 2019b). We estimated the fraction of significantly correlated connections using a density  
200 measure ( $K$ ) across the whole frequency domain, and visualized the networks showing broad  
201 spatial effects (Figure 3).

202

203 The C2 score was positively correlated with an extensive pattern at higher delta frequencies  
204 in both sleep states (AS: 1.2–4.5 Hz,  $K = 5\text{--}14\%$ , QS: 1.2–3.1 Hz,  $K = 6\text{--}10\%$ ,  $p < 0.05$ ,  $q =$   
205 0.05). The corresponding spatial patterns incorporated broad networks linking multiple distal  
206 areas. In contrast, the C1 score showed only mildly elevated density, or small networks, with  
207 positive correlation at 2.6–4.5 Hz during AS ( $K = 4\text{--}8\%$ ,  $p < 0.05$ ,  $q = 0.05$ ), and a negative  
208 correlation at 1.5–1.8 Hz during QS ( $K = 5\text{--}6\%$ ,  $p < 0.05$ ,  $q = 0.05$ ). Effect sizes (mean of  
209 Spearman  $\rho$  over the positive and negative correlation networks) are depicted in Figure 3—  
210 figure supplement 1. A comparable analysis for healthy controls (Figure 3—figure supplement  
211 2) showed only a few negative correlations between edge strength and neurological scores.  
212 The spatial distributions for all investigated frequency bands are presented in Figure 3—figure  
213 supplement 3 for C1 and Figure 3—figure supplement 4 for C2.

214

215 These findings together suggest that the relationship between cortical networks and  
216 neurological performance is affected by prematurity. The EP infants exhibit brain-wide  
217 relationships between cortical networks and neurological performance, which is not seen in  
218 the HC infants.

219

220

Phase-based cortical synchrony is affected by prematurity

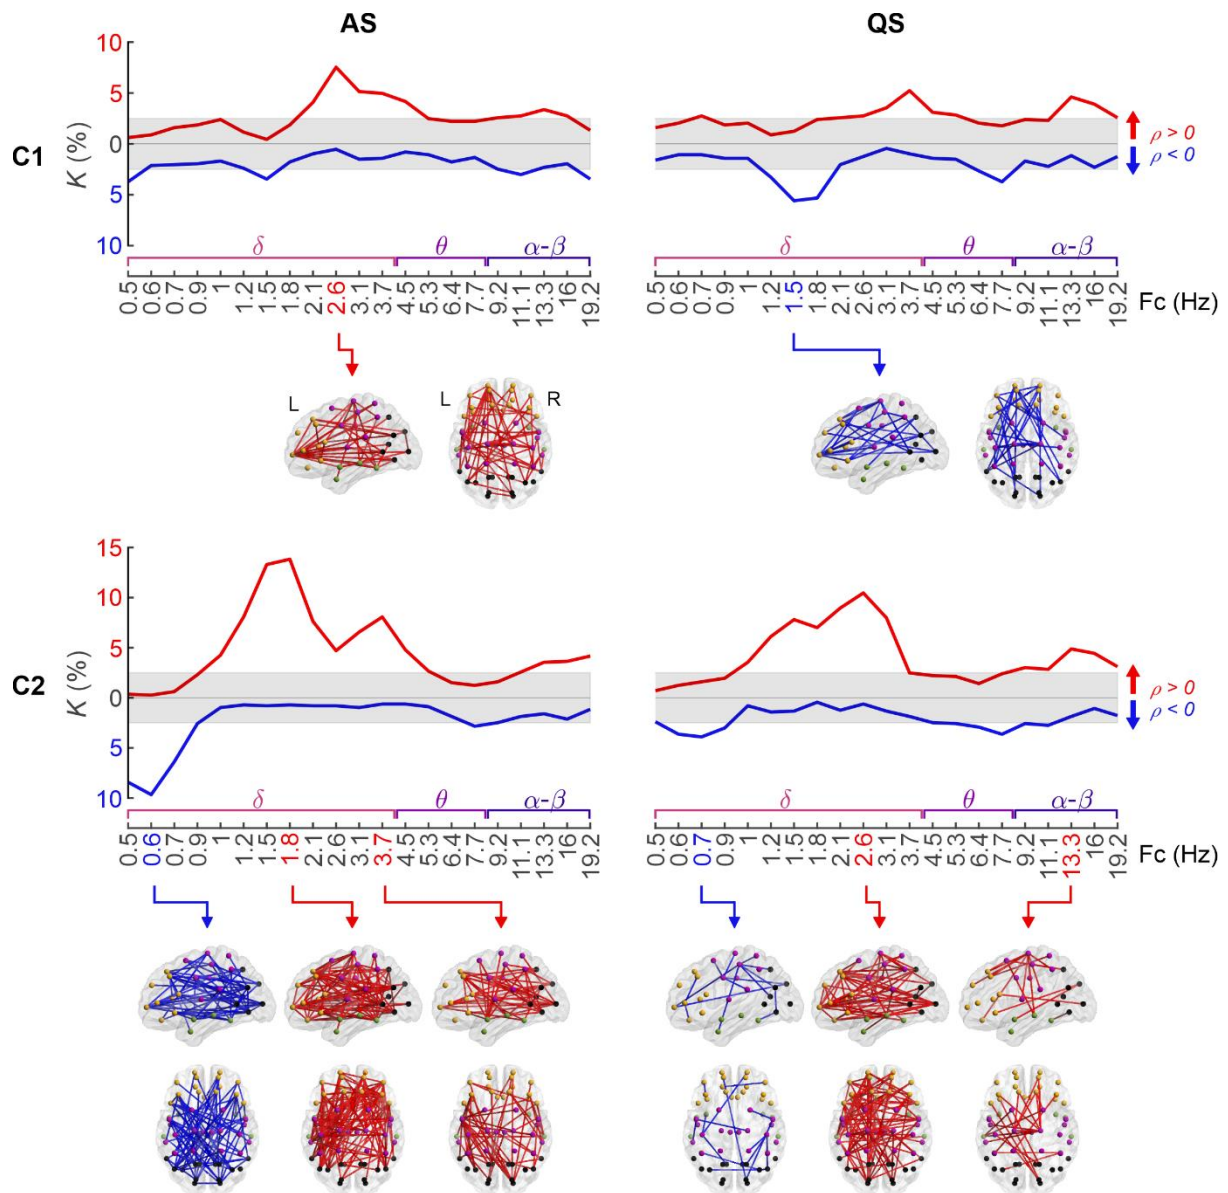

221

222

223 **Figure 3. PPC networks of ex-preterm infants at term age predict neurological outcome.**

224 Density ( $K$ ) of PPC patterns that associate to neurological scores C1 and C2 (Spearman, two-

225 tailed test with conceptional age as a covariate,  $\alpha = 0.05$ ) as a function of frequency. The grey

226 shaded area depicts the FDR boundaries ( $q = 0.05$ ). The opaque brains show the spatial

227 distributions of networks taken at the most characteristic peaks of the density curves. Red

228 coloring pictures networks with positive correlation ( $\rho \geq 0$ ), while blue coloring shows

229 negatively correlated connections ( $\rho < 0$ ) in both the graphs and 3-dimensional plots. The

230 graph data is provided in Figure 3—source data 1 and the full  $p$ -value and effect size matrices

231 in Figure 3—source data 2.

## Phase-based cortical synchrony is affected by prematurity

232

### 233 **Correlation of functional connectivity and neurological performance extends to long-** 234 **term neurocognitive outcomes**

235 Finally, we examined the relation of PPC networks to long-term neurocognitive development,  
236 assessed at 2 years of age using standardized Bayley (Bayley, 2006) and Griffiths (Huntley,  
237 1996) scores. Akin to our analysis above on newborn clinical performance, we also correlated  
238 the strength of individual connections in the PPC networks of the EP infants to their clinical  
239 outcome measures at two years of age. Most of the significant correlations emerged for visual,  
240 motor, cognitive, and language comprehension scores at lower frequencies (Figure 4), forming  
241 mostly spatially constrained patterns.

242

243 Visual scores correlated positively with PPC at  $F_c = 0.5$  Hz during both sleep states ( $K = 5$ –  
244  $6\%$ ,  $p < 0.05$ ,  $q = 0.05$ ), involving networks from left frontal and right occipital regions. There  
245 were also some negative correlations between visual scores and PPC during AS ( $K = 6$ – $8\%$ ,  
246  $p < 0.05$ ,  $q = 0.05$ ), located mostly in the frontal regions ( $F_c = 2.6$  Hz) or occipital regions ( $F_c$   
247  $= 7.7$  Hz).

248

249 Motor scores featured a prominent positive correlation during both sleep states at  $F_c = 1.5$  Hz  
250 ( $K = 7\%$ ,  $p < 0.05$ ,  $q = 0.05$ ) with a broad spatial distribution over several cortical regions. We  
251 also found a somewhat smaller extent network with a positive correlation to motor score during  
252 QS at a slightly higher frequency ( $F_c = 3.1$  Hz;  $K = 5\%$ ,  $p < 0.05$ ,  $q = 0.05$ ). Finally, a subset  
253 of occipital interhemispheric connections showed negative correlation to motor scores during  
254 both sleep states at the lowest frequencies ( $F_c = 0.6$  Hz;  $K = 4\%$ ,  $p < 0.05$ ,  $q = 0.05$ ).

255

256 The cognitive performance score showed negative correlations at low (AS and QS;  $F_c = 0.5$   
257 Hz;  $K = 5$ – $8\%$ ,  $p < 0.05$ ,  $q = 0.05$ ) and high frequencies (AS only;  $F_c = 16$  Hz;  $K = 6\%$ ,  $p <$   
258  $0.05$ ,  $q = 0.05$ ), involving networks that connect frontal, parietal, and occipital regions. A

## Phase-based cortical synchrony is affected by prematurity

259 smaller network displayed positive correlations with cognitive performance during AS at  $F_c =$   
260 1.8 Hz ( $K = 4\%$ ,  $p < 0.05$ ,  $q = 0.05$ ), involving mostly frontal connections.

261

262 Language comprehension was strongly and positively correlated to PPC strength in AS (peak  
263 at  $F_c = 1.8$  Hz,  $K = 5\%$ ,  $p < 0.05$ ,  $q = 0.05$ ), involving networks from the left temporal to frontal  
264 regions, aligning well with the cortical areas that are known to participate in language  
265 comprehension (Tremblay & Dick, 2016). A negative correlation between PPC strength and  
266 language comprehension scores was present during QS in the basal long-range connections  
267 at lower frequencies ( $F_c = 0.5$  Hz,  $K = 5\%$ ,  $p < 0.05$ ,  $q = 0.05$ ), as well as diffuse brain-wide  
268 network at mid-frequencies during AS ( $F_c = 7.7$  Hz,  $K = 4\%$ ,  $p < 0.05$ ,  $q = 0.05$ ).

269

270 Effect sizes were computed as the mean of Spearman  $\rho$  of the positive and negative networks  
271 separately and are presented as a function of frequency in Figure 4—figure supplement 1.  
272 The spatial distributions at all investigated frequency ranges are shown in Figure 4—figure  
273 supplement 2–5.

274

275

276

277

278

279

Phase-based cortical synchrony is affected by prematurity

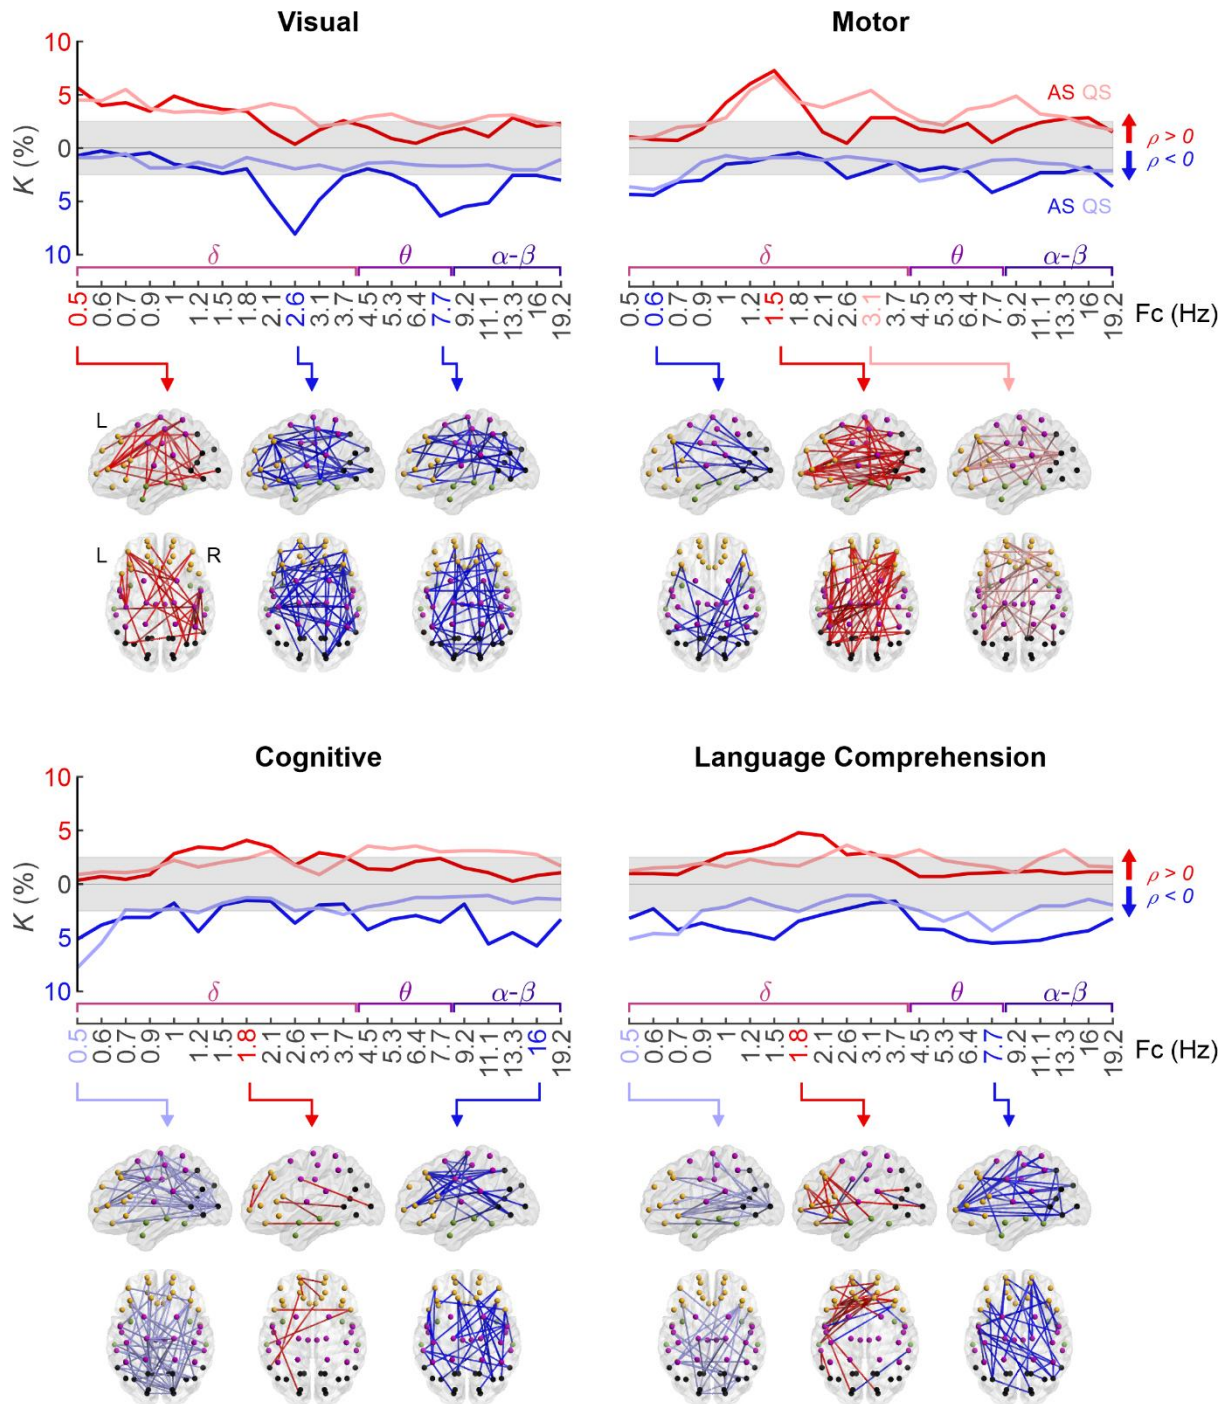

280

281

282 Figure 4. **Correlation of PPC network strength to 2-year neurocognition.** The upper  
 283 graphs show the frequency-wise summary of the proportion of network edges ( $K$ ) that show a  
 284 significant correlation between PPC strength and the given neurocognitive performance score  
 285 (Spearman, two-tailed test with conceptual age as a covariate,  $\alpha = 0.05$ ). The FDR ( $q = 0.05$ )  
 286 boundaries are depicted as a grey shaded area. The strongest peaks in these plots were

## Phase-based cortical synchrony is affected by prematurity

287 selected for the 3-dimensional visualisations of networks as indicated with arrows. Colour  
288 coding represents the sign of correlation (red:  $\rho \geq 0$ , blue  $\rho < 0$ ) and hues represent sleep  
289 states (dark: AS, light: QS) in the graphs and the spatial visualisations. The data displayed in  
290 the curves is provided in Figure 4—source data 1 and the  $p$ -value and effect size matrices  
291 from which the graphs were created in Figure 4—source data 2.

Phase-based cortical synchrony is affected by prematurity

## 292 **Discussion**

293 Our study shows that spontaneous cortical activity in the human infants exhibits large-scale  
294 PPC structures, that are spectrally and spatially selective and co-vary with vigilance states.  
295 Moreover, we show that the globally most significant clinical risk factor, preterm birth (WHO,  
296 2012), leads to frequency-selective changes in these networks, which correlate to  
297 neurocognitive performance of the affected individuals. Our work employed novel realistic  
298 cortical source reconstruction and independent parallel analyses to validate the results on  
299 clinical network correlations. Our findings are broadly consistent with recent work on adults  
300 showing that multiple frequency-specific PPC networks coexist (De Domenico et al., 2016;  
301 Siebenhühner et al., 2016; Vidaurre et al., 2018; Yu et al., 2017) and correlate with normal  
302 and pathological behaviour (Siebenhühner et al., 2016; Yu et al., 2017). Our work extends  
303 prior studies reporting prematurity effects on the temporally loose amplitude correlations  
304 (Omidvarnia et al., 2014; Tokariev et al., 2019a); here we provide evidence that the cortico-  
305 cortical interactions in newborn infants are already accurate enough to give rise to spectrally  
306 and spatially specific PPC structures, and pathological effects therein.

307

308 It has recently become clear that brain function relies on several co-existing frequency-specific  
309 PPC networks, which are reported to show temporal dynamics between awake states in the  
310 adults (Siebenhühner et al., 2016; Vidaurre et al., 2018) or between sleep states in the  
311 neonatal studies (Tokariev et al., 2019b; Tokariev et al., 2016b). Here, we show that medical  
312 adversities can affect these PPC networks in a selective manner, at preferential frequencies,  
313 and with preferential spatial distributions, as well as differing between vigilance states. For  
314 instance, prematurity caused an increase in middle frequency PPC in long-range connections  
315 throughout the brain, while the changes in higher frequencies were more localized in the  
316 middle and long-range connections in the basal brain areas. These effects were more  
317 pronounced during active sleep for the middle frequencies, while high frequency findings were  
318 essentially similar between sleep states. The findings are compatible with a notion that the



### Phase-based cortical synchrony is affected by prematurity

319 functional significance of frequency-specific PPC networks depends on their context, the brain  
320 state, in addition to their given frequency.

321

322 Our present findings extend the long-held clinical tradition where quiet sleep is considered to  
323 be the most sensitive state in disclosing effects of prematurity in the EEG records. In the  
324 clinical visual review, the EEG signal is considered to exhibit dysmature/immature features  
325 (Lombroso, 1979; Tharp, 1990), and the most robust feature is augmented “interhemispheric  
326 asynchrony”, or temporal non-overlap between cortical bursting (Koolen et al., 2014; Räsänen  
327 et al., 2013). While the clinically perceived interhemispheric asynchrony considers quiet sleep  
328 and amplitude correlations only, here we show that robust prematurity effects are also seen in  
329 the PPC networks, and they are clear during active sleep. Moreover, the functional  
330 significance of the PPC network during active sleep is shown by their pronounced correlations  
331 to subject-level clinical performance.

332

333 The strength of PPC connectivity in several brain-wide subnetworks was found to correlate to  
334 infants’ neurological performance at term age, which extends prior reports on clinical  
335 correlations to frontally connected delta frequency networks (Tokariev et al., 2019b). Clinical  
336 correlations were clearly widest for the C2 composite score which emphasizes features of  
337 newborn performance that pre-empt later cognitive development (Tokariev et al., 2019b).  
338 Comparison to neurocognitive performance at 2 years of age showed also several albeit  
339 smaller PPC subnetworks with significant correlations. PPC connectivity relies on a temporally  
340 accurate neural communication that requires sufficiently matured cortico-cortical pathways  
341 (Palva & Palva, 2011; Womelsdorf et al., 2007). The previously described diffuse and  
342 extensive white matter abnormalities after prematurity (Dimitrova et al., 2020) may provide a  
343 straightforward histological underpinning for the changes, especially the observed decrease  
344 in higher frequency PPC networks.

345

## Phase-based cortical synchrony is affected by prematurity

346 While our findings suggest clinically meaningful functions for the herein characterized PPC  
347 networks in the EP infants, it was somewhat unexpected that comparable correlations were  
348 not found in the group of healthy control infants. That observation suggests an altered  
349 relationship between PPC networks and neurocognitive phenotypes, which calls for a  
350 reasonable mechanistic explanation. It is possible that the network-phenotype relationship  
351 becomes amplified in the preterm cohort that is known to exhibit considerable variation in their  
352 histological maturation (Dimitrova et al., 2020). Prior studies have shown brain-wide effects of  
353 prematurity on the histological structures of white matter tracts (Dimitrova et al., 2020) and  
354 these changes were shown to correlate with several characteristics of newborn or later  
355 neurocognitive performance (Girault et al., 2019; Stjerna et al., 2015; Toulmin et al., 2020;  
356 Vollmer et al., 2017). An alternative mechanism is that the effects found in EP infants reflect  
357 a transient network immaturity (Lombroso, 1979; Tharp, 1990) that would catch up during later  
358 development. Testing this hypothesis would need repeated EEG network studies in the EP  
359 infants near term-equivalent age to show a developmental catch up in the PPC networks  
360 (Tokariev et al., 2016b) or in other functional brain age (Stevenson et al., 2020).

361

362 The present results suggest a clinically meaningful effect on PPC networks that could  
363 potentially serve as a functional biomarker to, *e.g.*, benchmark early therapeutic interventions  
364 (Ewen et al., 2019; Sahin et al., 2020). Our current study needs to be considered as  
365 observational work that identified putative analysis pipelines and network markers. Future  
366 prospective studies on larger cohorts are needed for their validation, and to define the  
367 perceived added value of network assessment from the perspective of monitoring early  
368 neurodevelopment and benchmarking early therapeutic interventions. In addition, the hereby  
369 demonstrated network effects may offer a unique translational bridge: The PPC networks  
370 could be used as a functional benchmark for establishing the clinical neurodevelopmental  
371 relevance of preclinical models of human prematurity.

## Phase-based cortical synchrony is affected by prematurity

### 372 **Methods**

373 The full study pipeline can be viewed in Figure 1.

374

### 375 **Subjects**

376 The dataset included N = 46 early preterm (EP) and N = 67 healthy control (HC) infants. The

377 conceptional ages (CA) at birth of the EP group (mean  $\pm$  standard deviation, SD) were 24.4

378  $\pm$  1.2 weeks and those of the HC group were 38.4  $\pm$  1.1 weeks. This dataset was collated

379 from cohorts that have been published in previous studies (Omidvarnia et al., 2014; Tokariev

380 et al., 2016b; Tokariev et al., 2019a; Tokariev et al., 2019b). The study design was approved

381 by the Ethics Committee of the Helsinki University Central Hospital and informed consent was

382 obtained from a parent or guardian for each subject.

383

### 384 **EEG recordings**

385 Multi-channel scalp EEG data was collected from both infant groups during day sleep. The

386 requirement for the recording session was that each subject had to undergo two vigilance

387 states: active sleep (AS) and quiet sleep (QS). EEG registration was performed using

388 Waveguard caps with 19-28 sintered Ag/AgCl electrodes (ANT-Neuro, Berlin, Germany)

389 located according to International 10-20 standard layout. Signals from both groups were

390 recorded mostly with the NicOne EEG amplifier (Cardinal Healthcare, Ohio/Natus,

391 Pleasanton, USA), but few EP subjects were recorded with the Cognitrace amplifier (ANT

392 B.V., Enschede, The Netherlands). EEG recordings for both groups were performed at term-

393 equivalent age of 41.4  $\pm$  1.4 weeks CA (mean  $\pm$  SD). The original sampling frequency was

394 256 Hz or 500 Hz, but all data was resampled to 250 Hz when exporting them into European

395 Data Format (EDF).

396

### 397 **Clinical assessments**

## Phase-based cortical synchrony is affected by prematurity

398 Newborn neurological assessments (Hammersmith Neonatal Neurological Examination  
399 (HNNE), (Dubowitz et al., 1999), were conducted on the EP and HC cohorts at term-equivalent  
400 age. The test comprises six separate domains of neurodevelopment: reflexes, movements,  
401 posture tonus, tone patterns, abnormal signs, orientation and behaviour. To render them  
402 suitable for studying associations with PPC networks, we used dimensionality reduction as  
403 described earlier (Tokariev et al., 2019b). In brief, we created combination scores, C1 and C2,  
404 using principal component analysis (PCA) with Varimax Rotation from three individual tests  
405 (visual alertness, head raising in prone, and increased neck extensor tone). In the post hoc  
406 assessment, the resulting C1 was shown to correlate primarily with later motor performance,  
407 whereas C2 was found to be associated with later cognitive and social performance (Tokariev  
408 et al., 2019b).

409

410 Long-term neurocognitive follow-up assessment was performed only on the EP infants at two  
411 years of age, using Bayley Scales of Infant and Toddler Development (Bayley, 2006) and the  
412 Griffiths Mental Developmental Scales (Huntley, 1996). The neuropsychological follow-up  
413 data was not available for the HC infants. These neurocognitive assessment tests were  
414 chosen, because of their established, widespread clinical use plus a broad impact on lifelong  
415 neurocognitive performance and quality of life, hence supporting the translational potential of  
416 findings (Hernandez, 2018; Rogers & Hintz, 2016). While some other outcomes such as gross  
417 motor development or hearing may be sometimes affected in EP infants, prior studies have  
418 suggested that these are most likely modified by a host of individual and treatment  
419 interventions (Kilbride et al., 2018).

420

### 421 **EEG review and pre-processing**

422 Vigilance state assessment was performed through a combination of electrophysiological and  
423 behavioral measures, the latter observed using polygraphic channels (chin electromyogram,  
424 electrocardiogram, electrooculogram, and respiratory sensors). EEG traces during AS exhibit

## Phase-based cortical synchrony is affected by prematurity

425 continuous fluctuations, with an irregular respiration and occasional eye movements.  
426 Conversely, EEG during QS is characteristically discontinuous, with a regular respiration  
427 (André et al., 2010). We then selected 5-min-long artifact-free EEG epochs from  
428 representative periods of AS and QS. To avoid transition periods between vigilance states,  
429 representative sleep epochs were selected from within well-established patterns of  
430 corresponding behavior and brain activity. Epochs that did not meet quality and length  
431 requirements were excluded from the data pool. As a result, we obtained four final groups:  
432 EP-AS (N = 46), HC-AS (N = 53), EP-QS (N = 42), and HC-QS (N = 66). For each subject we  
433 selected the same N = 19 channels (Fp1, Fp2, F7, F3, Fz, F4, F8, T7, C3, Cz, C4, T8, P7, P3,  
434 Pz, P4, P8, O1, O2) to enable group-level analysis. All EEG signals were first pre-filtered within  
435 the 0.15–45 Hz frequency range using a combination of high- and low-pass Butterworth filters  
436 of the 7th order. All filtering in this work were implemented offline and in forward-backward  
437 directions to compensate for phase delays introduced by infinite impulse response filters. Next,  
438 the EEG data were downsampled to a new sampling frequency,  $F_s = 100$  Hz, and converted  
439 into average montage. Following our previous work (Tokariev et al., 2019a), we filtered the  
440 pre-processed EEG into 21 frequency bands of interest covering the range 0.4–22 Hz. Band-  
441 pass filtering was also implemented with pairs of low- and high-pass filters. The first central  
442 frequency ( $F_c$ ) was set to 0.5 Hz and subsequent frequencies were computed as  $F_c(i) =$   
443  $1.2 \times F_c(i-1)$ , where  $i$  is the number of the frequency band. Cut-off frequencies for each band  
444 were taken as  $0.85 \times F_c$  and  $1.15 \times F_c$  correspondingly. This approach leads to 50% overlapping  
445 frequency bands of semi-equal width in the logarithmic scale.

446

### 447 **Computation of cortical signals**

448 Band-pass filtered EEG were further source reconstructed to allow better spatial separation of  
449 cortical activities using a realistic infant head model (Tokariev et al., 2019b) and dynamic  
450 statistical parametric mapping (Dale et al., 2000). As the source space we used normal to  
451 cortical surface (at term age) dipoles of fixed orientation (N = 8014). The scalp and inner/outer

## Phase-based cortical synchrony is affected by prematurity

452 skull shells were segmented from magnetic resonance imaging (MRI) data from healthy full-  
453 term infant. Following previous studies (Despotovic et al., 2013; Odabae et al., 2014;  
454 Tokariev et al., 2016a), tissue conductivities were set to: 0.43 S/m for scalp, 1.79 S/m for  
455 intracranial volume, and 0.2 S/m for skull. Finally, cortical sources were clustered into  $N = 58$   
456 parcels according to the scheme optimized for infant EEG. Cortical signals representing neural  
457 activity of each parcel were computed as the weighted mean of source signals belonging to  
458 the host parcels (Tokariev et al., 2019b).

459

### 460 **Computation of functional connectivity**

461 To estimate functional connectivity, we computed phase-phase correlations (PPC) between  
462 all pairs of parcels using the debiased weighted phase-lag index (dwPLI), (Vinck et al., 2011).  
463 We opted to use this metric because of its robustness to artificial interactions caused by  
464 volume conduction (Palva et al., 2018; Palva & Palva, 2012). Connectivity was estimated using  
465 whole 5-min-long epochs, at 21 frequency bands and for both vigilance states (AS and QS).  
466 This led to a set of  $58 \times 58$  PPC matrices for each subject. Next, we corrected these matrices  
467 by multiplication with a binary 'fidelity' mask, which was computed for the particular electrode  
468 layout. This mask was generated using extensive simulations based on the head model, and  
469 it removes 'noisy' connections from a connectivity matrix (Tokariev et al., 2019b). This  
470 procedure aims to improve the reliability of cortical-level network estimation from a suboptimal  
471 number of recording electrodes which are usually used in clinical recordings (Tokariev et al.,  
472 2016a). Note, that fidelity mask removes the same edges from all empirical connectivity  
473 matrices.

474

### 475 **Network analysis**

476 To test network differences between EP and HC, we applied the Wilcoxon rank sum test (two  
477 one-tailed tests,  $\alpha = 0.01$ ) in an edge-by-edge manner with defined directions (EP > HC and  
478 EP < HC). This was done for each frequency band and for each sleep state separately. As a  
479 result of such edgewise scanning, we obtained matrices of  $p$ -values corresponding to the

## Phase-based cortical synchrony is affected by prematurity

480 network connections and computed the ratio ( $K$ ) of edges with significant group difference to  
481 the full network. To estimate the potential number of false discoveries in the frequency-specific  
482 group contrasts, we employed the Storey-Tibshirani adaptive FDR method using  $q = 0.01$  with  
483 respect to the size of the whole network (*i.e.*, up to  $N = 1128 \times 0.01 = 11$  connections in each  
484 network were classified as potential false discoveries), (Puoliväli et al., 2020; Storey &  
485 Tibshirani, 2003). Effect size for the significantly different patterns was computed as a module  
486 of the mean of rank-biserial correlation values for corresponding connections. The influence  
487 of age differences on network strength was investigated by correlating the global mean  
488 connectivity strength with age for each group per frequency and sleep state (Spearman  
489 correlation, two-tailed test,  $\alpha$ -level 0.05). The  $p$ -values of both sleep states were pooled  
490 together separately for each group and controlled for multiple comparisons by the Benjamini-  
491 Hochberg procedure (Benjamini & Hochberg, 1995).

492

493 Parallel to the primary analysis, a cross-check for statistical group comparison was performed  
494 using network-based statistics (NBS) (Zalesky et al., 2010) separately for the 21 frequency  
495 bands and two sleep states using two one-tailed tests (EP > HC and EP < HC). NBS is a  
496 multiple comparisons method designed specifically for network analysis. It assumes that  
497 connections reflecting true effects are interconnected into networks encompassing more than  
498 a single connection. The connected components are defined in a topological space, in contrary  
499 to other cluster-based methods, which use a physical space (Genovese et al., 2002; Zalesky  
500 et al., 2010). The initial threshold for the t-statistic was set to 2.5, followed by the post hoc  
501 permutation test to correct the family-wise error rate (5000 permutations,  $\alpha = 0.05$ ).

502

### 503 **Clinical correlation**

504 The connectivity strength of each edge across the infant group was correlated with the  
505 corresponding neurological assessments at term-equivalent age and with the corresponding  
506 neurocognitive performance scores at two years of age (Spearman, two-tailed test with  $\alpha$ -level  
507 0.05) with conceptional age as a covariate. We computed the fraction of edges showing

## Phase-based cortical synchrony is affected by prematurity

508 significant clinical correlation ( $K$ ) for each frequency band and sleep state. Only the EP cohort  
509 had performance scores tested at 2 years of age. Some subjects had missing clinical scores,  
510 rendering the number of subjects used for each correlation to: C1: EP-AS (N = 39), EP-QS (N  
511 = 36), HC-AS (N = 30), HC-QS (N = 51); C2: EP-AS (N = 39), EP-QS (N = 36), HC-AS (N =  
512 40), HC-QS (N = 51); Griffiths Visual: EP-AS (N = 35), EP-QS (N = 32); Griffiths Motor: EP-  
513 AS (N = 39), EP-QS (N = 36); Bayley Cognitive: EP-AS (N = 32), EP-QS (N = 30); Bayley  
514 Language comprehension: EP-AS (N = 30), EP-QS (N = 28). Multiple comparisons correction  
515 was implemented with the Storey-Tibshirani adaptive FDR with  $q = 0.05$  (*i.e.*, 2.5 % of the  
516 positive and negative correlations separately were classified as potential false discoveries).  
517 The Spearman  $\rho$ -value was used for estimating effect size: it was computed for all significant  
518 edges and averaged across the full network.

519

### 520 **Analysis software**

521 Source reconstruction was conducted using the Brainstorm (Tadel et al., 2011),  
522 (<https://neuroimage.usc.edu/brainstorm/Introduction>), and the openMEEG (Gramfort et al.,  
523 2010), (<https://openmeeeg.github.io/>), software packages. Analyses were performed with  
524 Matlab R2020a (MathWorks, Naticks, MA, USA) and NBS Connectome (Zalesky et al., 2010),  
525 (<https://www.nitrc.org/projects/nbs/>), and the visualization of brain networks was carried out  
526 with BrainNet Viewer (Xia et al., 2013), (<https://www.nitrc.org/projects/bnv/>).

527

528 The Matlab script implementing the network analyses of group differences and clinical  
529 correlation can be found at <https://github.com/pauliina-yrjola/Preterm-Phase>.

530



## Phase-based cortical synchrony is affected by prematurity

### 531 **Bibliography**

- 532 André, M., Lamblin, M.-D., d'Allest, A.-M., Curzi-Dascalova, L., Moussalli-Salefranque, F., Tich, S. N. T.,  
533 Vecchierini-Blineau, M.-F., Wallois, F., Walls-Esquivel, E., & Plouin, P. (2010). Electroencephalography  
534 in premature and full-term infants. Developmental features and glossary. *Neurophysiologie  
535 Clinique/Clinical Neurophysiology*, 40(2), 59–124.
- 536 Batalle, D., Hughes, E. J., Zhang, H., Tournier, J.-D., Tusor, N., Aljabar, P., Wali, L., Alexander, D. C., Hajnal, J.  
537 V., & Nosarti, C. (2017). Early development of structural networks and the impact of prematurity on brain  
538 connectivity. *Neuroimage*, 149, 379–392.
- 539 Bayley, N. (2006). Bayley scales of infant and toddler development, San Antonio, TX: Harcourt Assessment. *Inc.*  
540 *p*, 266.
- 541 Benjamini, Y., & Hochberg, Y. (1995). Controlling the false discovery rate: A practical and powerful approach to  
542 multiple testing. *Journal of the Royal Statistical Society: Series B (Methodological)*, 57(1), 289–300.
- 543 Bressler, S., & Menon, V. (2010). Large-scale brain networks in cognition: Emerging methods and principles.  
544 *Trends in Cognitive Sciences*, 14(6), 277–290.
- 545 Dale, A., Liu, A. K., Fischl, B. R., Buckner, R. L., Belliveau, J. W., Lewine, J. D., & Halgren, E. (2000). Dynamic  
546 statistical parametric mapping: Combining fMRI and MEG for high-resolution imaging of cortical activity.  
547 *Neuron*, 26(1), 55–67.
- 548 De Domenico, M., Granell, C., Porter, M. A., & Arenas, A. (2016). The physics of spreading processes in  
549 multilayer networks. *Nature Physics*, 12(10), 901–906.
- 550 Despotovic, I., Cherian, P. J., De Vos, M., Hallez, H., Deburchgraeve, W., Govaert, P., Lequin, M., Visser, G. H.,  
551 Swarte, R. M., & Vansteenkiste, E. (2013). Relationship of EEG sources of neonatal seizures to acute  
552 perinatal brain lesions seen on MRI: A pilot study. *Human Brain Mapping*, 34(10), 2402–2417.
- 553 Dimitrova, R., Pietsch, M., Christiaens, D., Ciarrusta, J., Wolfers, T., Batalle, D., Hughes, E., Hutter, J., Cordero-  
554 Grande, L., & Price, A. N. (2020). Heterogeneity in brain microstructural development following preterm  
555 birth. *Cerebral Cortex*, 30(9), 4800–4810.
- 556 Dubowitz, L., Dubowitz, V., & Mercuri, E. (1999). *The neurological assessment of the preterm and full-term  
557 newborn infant*. Cambridge University Press.
- 558 Engel, A., Gerloff, C., Hilgetag, C. C., & Nolte, G. (2013). Intrinsic coupling modes: Multiscale interactions in  
559 ongoing brain activity. *Neuron*, 80(4), 867–886.
- 560 Ewen, J., Sweeney, J. A., & Potter, W. Z. (2019). Conceptual, regulatory and strategic imperatives in the early  
561 days of EEG-based biomarker validation for neurodevelopmental disabilities. *Frontiers in Integrative  
562 Neuroscience*, 13, 45.

## Phase-based cortical synchrony is affected by prematurity

- 563 Genovese, C., Lazar, N. A., & Nichols, T. (2002). Thresholding of Statistical Maps in Functional Neuroimaging  
564 Using the False Discovery Rate. *NeuroImage*, 15(4), 870–878. <https://doi.org/10.1006/nimg.2001.1037>
- 565 Girault, J., Cornea, E., Goldman, B. D., Knickmeyer, R. C., Styner, M., & Gilmore, J. H. (2019). White matter  
566 microstructural development and cognitive ability in the first 2 years of life. *Human Brain Mapping*, 40(4),  
567 1195–1210.
- 568 Gramfort, A., Papadopoulos, T., Olivi, E., & Clerc, M. (2010). OpenMEEG: Opensource software for quasistatic  
569 bioelectromagnetics. *Biomedical Engineering Online*, 9(1), 1–20.
- 570 Guo, T., Duerden, E. G., Adams, E., Chau, V., Branson, H. M., Chakravarty, M. M., Poskitt, K. J., Synnes, A.,  
571 Grunau, R. E., & Miller, S. P. (2017). Quantitative assessment of white matter injury in preterm  
572 neonates: Association with outcomes. *Neurology*, 88(7), 614–622.
- 573 Hipp, J., Hawellek, D. J., Corbetta, M., Siegel, M., & Engel, A. K. (2012). Large-scale cortical correlation structure  
574 of spontaneous oscillatory activity. *Nature Neuroscience*, 15(6), 884–890.
- 575 Huntley, M. (1996). The Griffiths mental developmental scales manual from birth to two years. *Association for the*  
576 *Research in Infant and Child Development (The Test Agency, Thames, 1996)*.
- 577 Johnson, S., & Marlow, N. (2017). Early and long-term outcome of infants born extremely preterm. *Archives of*  
578 *Disease in Childhood*, 102(1), 97–102.
- 579 Kilbride, H., Aylward, G. P., & Carter, B. (2018). What are we measuring as outcome? Looking beyond  
580 neurodevelopmental impairment. *Clinics in Perinatology*, 45(3), 467–484.
- 581 Koolen, N., Dereymaeker, A., Räsänen, O., Jansen, K., Vervisch, J., Matic, V., De Vos, M., Van Huffel, S.,  
582 Naulaers, G., & Vanhatalo, S. (2014). Interhemispheric synchrony in the neonatal EEG revisited:  
583 Activation synchrony index as a promising classifier. *Frontiers in Human Neuroscience*, 8, 1030.
- 584 Leon Hernandez, A. (2018). *The impact of prematurity on social and emotional development*.
- 585 Lombroso, C. (1979). Quantified electrographic scales on 10 pre-term healthy newborns followed up to 40–43  
586 weeks of conceptional age by serial polygraphic recordings. *Electroencephalography and Clinical*  
587 *Neurophysiology*, 46(4), 460–474.
- 588 Luhmann, H., Sinning, A., Yang, J.-W., Reyes-Puerta, V., Stüttgen, M. C., Kirischuk, S., & Kilb, W. (2016).  
589 Spontaneous neuronal activity in developing neocortical networks: From single cells to large-scale  
590 interactions. *Frontiers in Neural Circuits*, 10, 40.
- 591 Molnár, Z., Luhmann, H. J., & Kanold, P. O. (2020). Transient cortical circuits match spontaneous and sensory-  
592 driven activity during development. *Science*, 370(6514).
- 593 Odabae, M., Tokariev, A., Layeghy, S., Mesbah, M., Colditz, P. B., Ramon, C., & Vanhatalo, S. (2014).  
594 Neonatal EEG at scalp is focal and implies high skull conductivity in realistic neonatal head models.  
595 *Neuroimage*, 96, 73–80.

## Phase-based cortical synchrony is affected by prematurity

- 596 Omidvarnia, A., Fransson, P., Metsäranta, M., & Vanhatalo, S. (2014). Functional bimodality in the brain  
597 networks of preterm and term human newborns. *Cerebral Cortex*, *24*(10), 2657–2668.
- 598 World Health Organization (2012). *Born too soon: The global action report on preterm birth*.
- 599 Palva, J., Monto, S., Kulashekhar, S., & Palva, S. (2010). Neuronal synchrony reveals working memory networks  
600 and predicts individual memory capacity. *Proceedings of the National Academy of Sciences*, *107*(16),  
601 7580–7585.
- 602 Palva, J., Wang, S. H., Palva, S., Zhigalov, A., Monto, S., Brookes, M. J., Schoffelen, J.-M., & Jerbi, K. (2018).  
603 Ghost interactions in MEG/EEG source space: A note of caution on inter-areal coupling measures.  
604 *Neuroimage*, *173*, 632–643.
- 605 Palva, S., & Palva, J. M. (2011). Functional roles of alpha-band phase synchronization in local and large-scale  
606 cortical networks. *Frontiers in Psychology*, *2*, 204.
- 607 Palva, S., & Palva, J. M. (2012). Discovering oscillatory interaction networks with M/EEG: Challenges and  
608 breakthroughs. *Trends in Cognitive Sciences*, *16*(4), 219–230.
- 609 Puoliväli, T., Palva, S., & Palva, J. M. (2020). Influence of multiple hypothesis testing on reproducibility in  
610 neuroimaging research: A simulation study and Python-based software. *Journal of Neuroscience*  
611 *Methods*, 108654.
- 612 Räsänen, O., Metsäranta, M., & Vanhatalo, S. (2013). Development of a novel robust measure for  
613 interhemispheric synchrony in the neonatal EEG: Activation synchrony index (ASI). *Neuroimage*, *69*,  
614 256–266.
- 615 Rogers, E., & Hintz, S. R. (2016). Early neurodevelopmental outcomes of extremely preterm infants. *Seminars in*  
616 *Perinatology*, *40*(8), 497–509.
- 617 Sahin, M., Sweeney, J. A., & Jones, S. R. (2020). Biomarkers to Enable Therapeutics Development in  
618 Neurodevelopmental Disorders. *Frontiers in Integrative Neuroscience*.
- 619 Siebenhühner, F., Wang, S. H., Palva, J. M., & Palva, S. (2016). Cross-frequency synchronization connects  
620 networks of fast and slow oscillations during visual working memory maintenance. *Elife*, *5*, e13451.
- 621 Stevenson, N., Oberdorfer, L., Tataranno, M.-L., Breakspear, M., Colditz, P. B., de Vries, L. S., Benders, M. J.,  
622 Klebermass-Schrehof, K., Vanhatalo, S., & Roberts, J. A. (2020). Automated cot-side tracking of  
623 functional brain age in preterm infants. *Annals of Clinical and Translational Neurology*.
- 624 Stjerna, S., Sairanen, V., Gröhn, R., Andersson, S., Metsäranta, M., Lano, A., & Vanhatalo, S. (2015). Visual  
625 fixation in human newborns correlates with extensive white matter networks and predicts long-term  
626 neurocognitive development. *Journal of Neuroscience*, *35*(12), 4824–4829.
- 627 Storey, J., & Tibshirani, R. (2003). Statistical significance for genomewide studies. *Proceedings of the National*  
628 *Academy of Sciences*, *100*(16), 9440–9445.

## Phase-based cortical synchrony is affected by prematurity

- 629 Tadel, F., Baillet, S., Mosher, J. C., Pantazis, D., & Leahy, R. M. (2011). Brainstorm: A user-friendly application  
630 for MEG/EEG analysis. *Computational Intelligence and Neuroscience*, 2011.
- 631 Tewarie, P., Hunt, B. A., O'Neill, G. C., Byrne, A., Aquino, K., Bauer, M., Mullinger, K. J., Coombes, S., &  
632 Brookes, M. J. (2019). Relationships between neuronal oscillatory amplitude and dynamic functional  
633 connectivity. *Cerebral Cortex*, 29(6), 2668–2681.
- 634 Tharp, B. (1990). Electrophysiological brain maturation in premature infants: An historical perspective. *Journal of*  
635 *Clinical Neurophysiology: Official Publication of the American Electroencephalographic Society*, 7(3),  
636 302–314.
- 637 Tokariev, A., Roberts, J. A., Zalesky, A., Zhao, X., Vanhatalo, S., Breakspear, M., & Cocchi, L. (2019a). Large-  
638 scale brain modes reorganize between infant sleep states and carry prognostic information for preterms.  
639 *Nature Communications*, 10(1), 1–9.
- 640 Tokariev, A., Stjerna, S., Lano, A., Metsäranta, M., Palva, J. M., & Vanhatalo, S. (2019b). Preterm birth changes  
641 networks of newborn cortical activity. *Cerebral Cortex*, 29(2), 814–826.
- 642 Tokariev, A., Vanhatalo, S., & Palva, J. M. (2016a). Analysis of infant cortical synchrony is constrained by the  
643 number of recording electrodes and the recording montage. *Clinical Neurophysiology*, 127(1), 310–323.
- 644 Tokariev, A., Videman, M., Palva, J. M., & Vanhatalo, S. (2016b). Functional Brain Connectivity Develops Rapidly  
645 Around Term Age and Changes Between Vigilance States in the Human Newborn. *Cerebral Cortex*,  
646 26(12), 4540–4550. <https://doi.org/10.1093/cercor/bhv219>
- 647 Tóth, B., Urbán, G., Haden, G. P., Márk, M., Török, M., Stam, C. J., & Winkler, I. (2017). Large-scale network  
648 organization of EEG functional connectivity in newborn infants. *Human Brain Mapping*, 38(8), 4019–  
649 4033.
- 650 Toulmin, H., O'Muircheartaigh, J., Counsell, S. J., Falconer, S., Chew, A., Beckmann, C. F., & Edwards, A. D.  
651 (2020). Functional thalamocortical connectivity at term equivalent age and outcome at 2 years in infants  
652 born preterm. *Cortex*.
- 653 Tremblay, P., & Dick, A. S. (2016). Broca and Wernicke are dead, or moving past the classic model of language  
654 neurobiology. *Brain and Language*, 162, 60–71.
- 655 Vanhatalo, S., & Kaila, K. (2006). Development of neonatal EEG activity: From phenomenology to physiology.  
656 *Seminars in Fetal and Neonatal Medicine*, 11(6), 471–478.
- 657 Vanhatalo, S., Palva, J. M., Andersson, S., Rivera, C., Voipio, J., & Kaila, K. (2005). Slow endogenous activity  
658 transients and developmental expression of K<sup>+</sup>-Cl<sup>-</sup> cotransporter 2 in the immature human cortex.  
659 *European Journal of Neuroscience*, 22(11), 2799–2804.
- 660 Vidaurre, D., Hunt, L. T., Quinn, A. J., Hunt, B. A., Brookes, M. J., Nobre, A. C., & Woolrich, M. W. (2018).  
661 Spontaneous cortical activity transiently organises into frequency specific phase-coupling networks.  
662 *Nature Communications*, 9(1), 1–13.

## Phase-based cortical synchrony is affected by prematurity

- 663 Vinck, M., Oostenveld, R., Van Wingerden, M., Battaglia, F., & Pennartz, C. M. (2011). An improved index of  
664 phase-synchronization for electrophysiological data in the presence of volume-conduction, noise and  
665 sample-size bias. *Neuroimage*, 55(4), 1548–1565.
- 666 Vollmer, B., Lundequist, A., M\aaartensson, G., Nagy, Z., Lagercrantz, H., Smedler, A.-C., & Forssberg, H. (2017).  
667 Correlation between white matter microstructure and executive functions suggests early developmental  
668 influence on long fibre tracts in preterm born adolescents. *PloS One*, 12(6), e0178893.
- 669 Womelsdorf, T., Schoffelen, J.-M., Oostenveld, R., Singer, W., Desimone, R., Engel, A. K., & Fries, P. (2007).  
670 Modulation of neuronal interactions through neuronal synchronization. *Science*, 316(5831), 1609–1612.
- 671 Xia, M., Wang, J., & He, Y. (2013). BrainNet Viewer: A network visualization tool for human brain connectomics.  
672 *PloS One*, 8(7), e68910.
- 673 Yu, M., Engels, M. M., Hillebrand, A., Van Straaten, E. C., Gouw, A. A., Teunissen, C., Van Der Flier, W. M.,  
674 Scheltens, P., & Stam, C. J. (2017). Selective impairment of hippocampus and posterior hub areas in  
675 Alzheimer's disease: An MEG-based multiplex network study. *Brain*, 140(5), 1466–1485.
- 676 Zalesky, A., Fornito, A., & Bullmore, E. T. (2010). Network-based statistic: Identifying differences in brain  
677 networks. *Neuroimage*, 53(4), 1197–1207.
- 678

Phase-based cortical synchrony is affected by prematurity

679

## Supplementary Figures

680

681

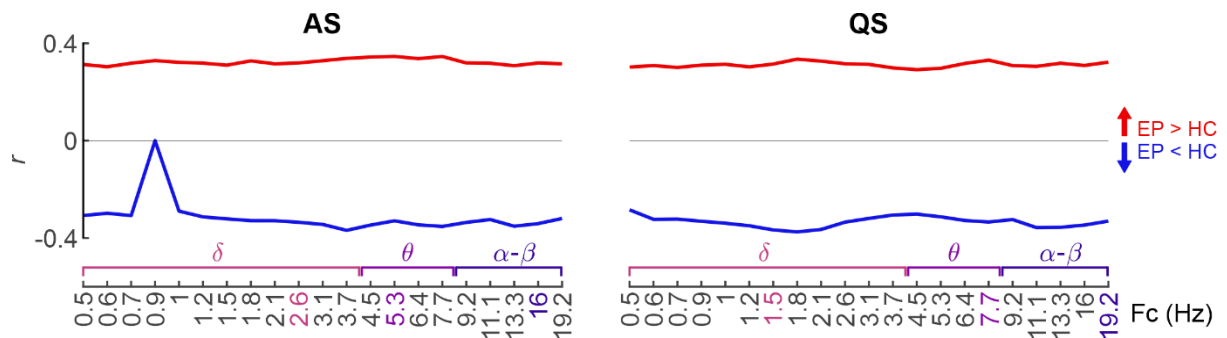

683

684 Figure 2—figure supplement 1. **Effect size of the statistical group differences on cortical**  
685 **PPC networks.** The effect size, computed by the mean rank-biserial correlation ( $r$ ) of the  
686 significant networks shown in Figure 1 (two one-tailed Wilcoxon rank sum tests,  $\alpha = 0.01$ )  
687 during active sleep (AS, left) and quiet sleep (QS, right), as a function of frequency. Networks  
688 with increased connectivity strength in EP (EP > HC) are shown in red, and networks with  
689 decreased connectivity in EP (EP < HC) are displayed in blue.

## Phase-based cortical synchrony is affected by prematurity

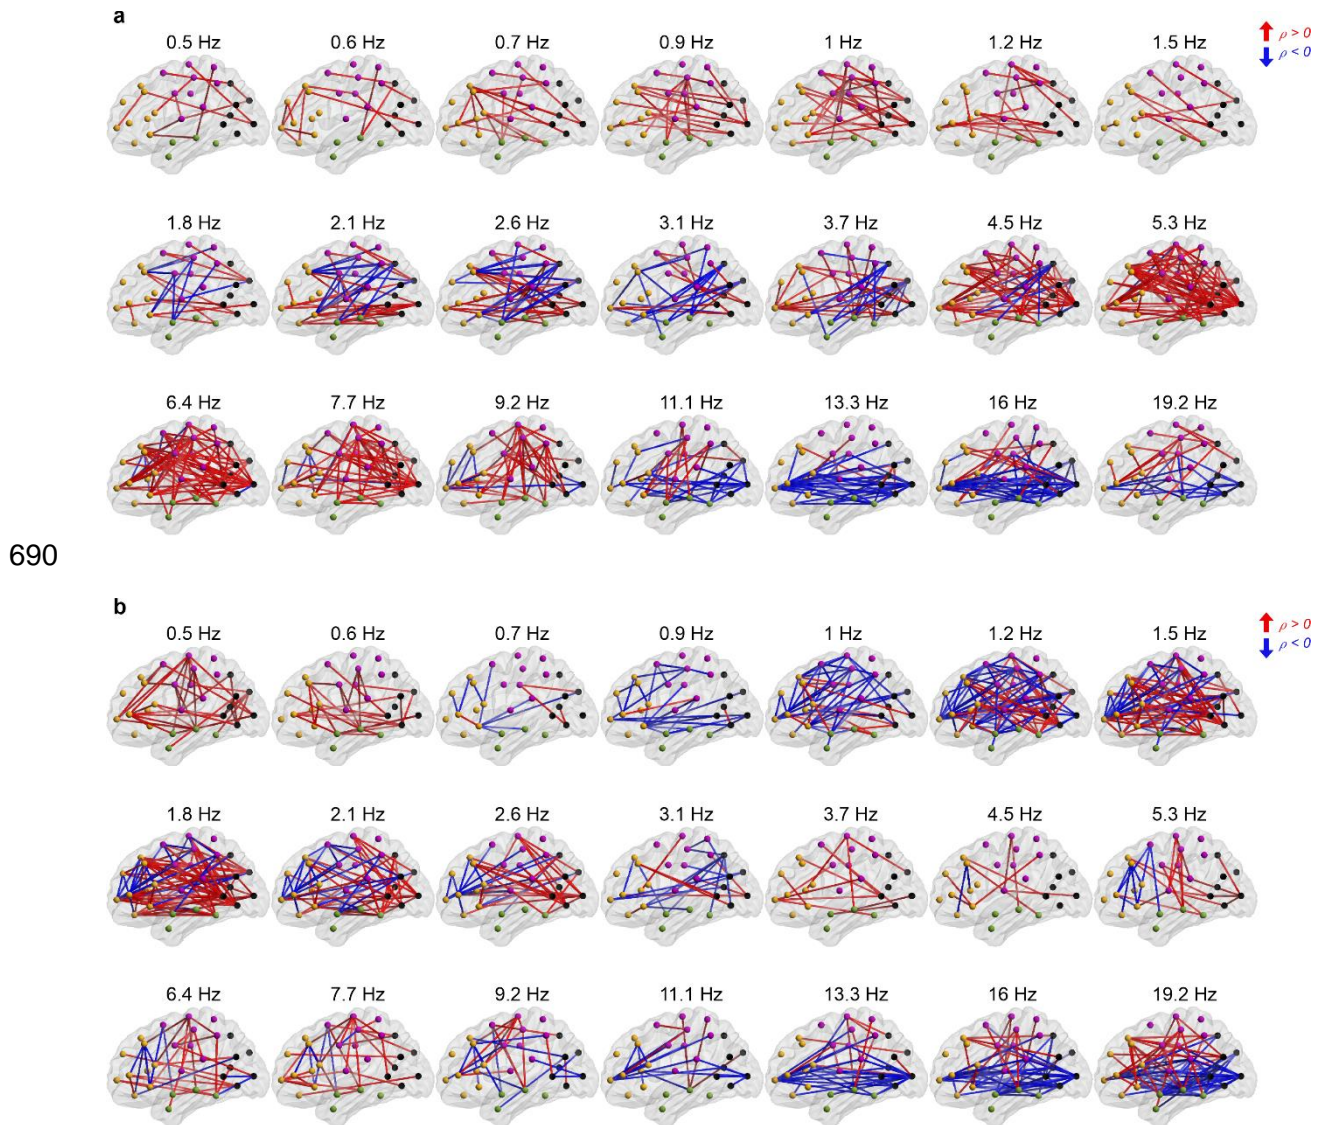

691

692

693 Figure 2—figure supplement 2. **Effects of prematurity on cortical PPC networks modulate**

694 **over frequency.** Spatial visualizations of the group difference networks obtained from network

695 density measurements (Figure 1, two one-tailed Wilcoxon rank sum tests,  $\alpha = 0.01$ ) over all

696 frequency bands in AS (a) and QS (b). Only the edges which passed FDR correction ( $q =$

697 0.01) are shown. Red networks display connections of increased connectivity in EP (EP > HC)

698 and blue networks reduced connectivity in EP (EP < HC).

### Phase-based cortical synchrony is affected by prematurity

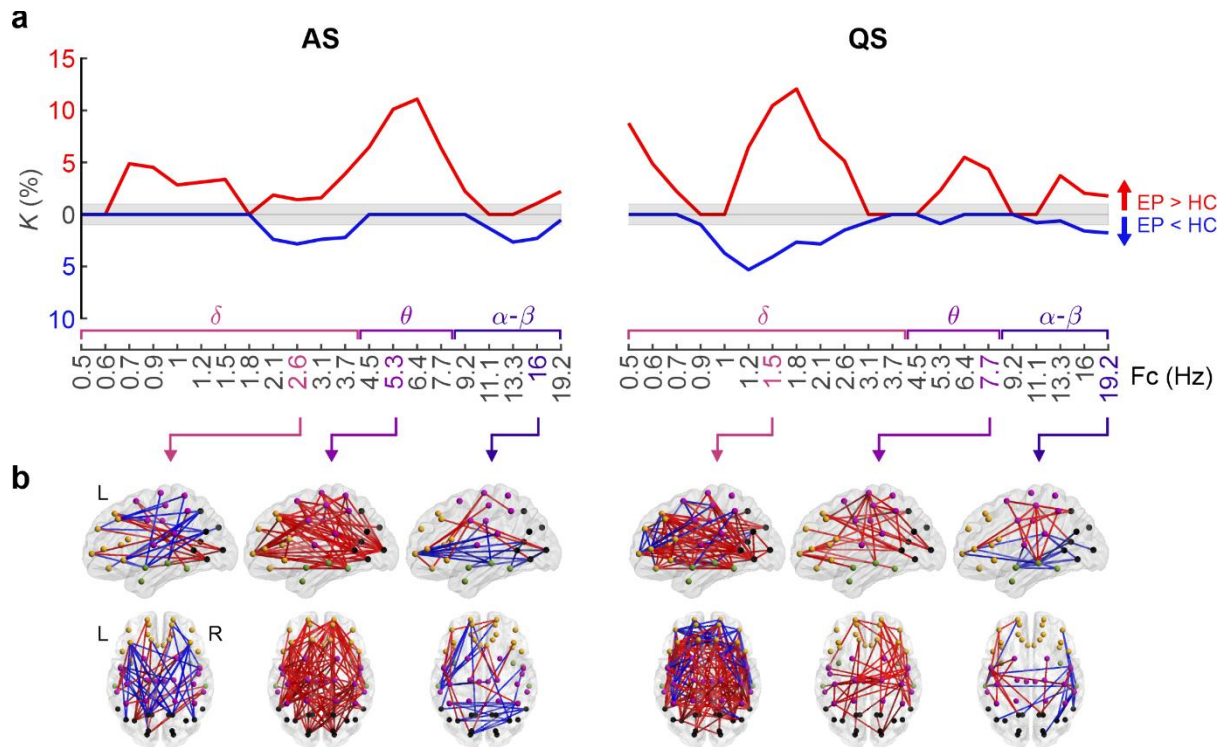

699

700

701 Figure 2—figure supplement 3. **Effects of prematurity on cortical PPC networks replicated**

702 **with an independent additional analysis. (a)** Network density ( $K$ ) of PPC group difference

703 networks computed with NBS Connectome (two one-tailed tests, threshold 2.5, significance

704 level  $\alpha = 0.05$ , 5000 permutations) is shown for AS (left) and QS (right) as a function of

705 frequency bands, denoted by their central frequencies. The directions of difference (EP > HC

706 or EP < HC) are indicated in red and blue, respectively. (b) 3-dimensional visualizations

707 present the spatial distribution of group difference networks at the frequencies selected from

708 Figure 1. The direction of difference is indicated as in (a).



Phase-based cortical synchrony is affected by prematurity

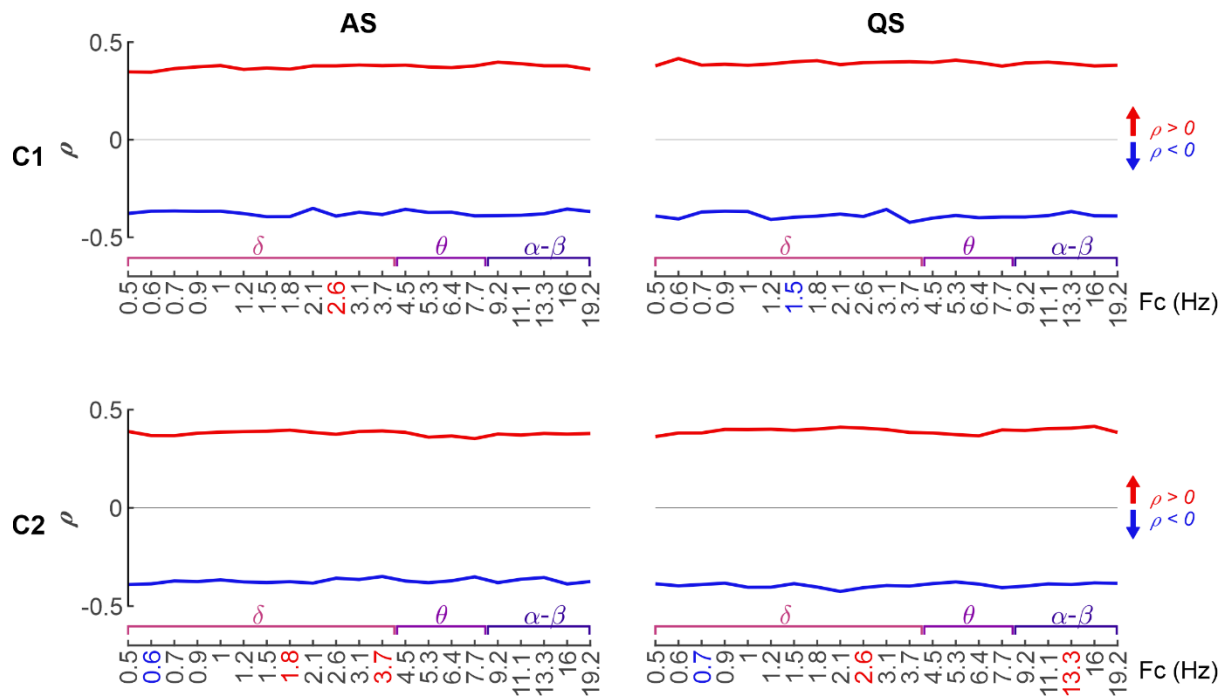

709

710

711 Figure 3—figure supplement 1. **Effect size of PPC networks depicting clinical correlation.**

712 The effect size, acquired from the mean Spearman (two-tailed test, with conceptual age as

713 a covariate, and  $\alpha = 0.05$ )  $\rho$ -value of the positive ( $\rho \geq 0$ , red) and negative ( $\rho < 0$ , blue)

714 networks, as a function of frequency band. The results are presented for active sleep (AS, left)

715 and quiet sleep (QS, blue), as well as for the neurological outcome scores C1 (above) and C2

716 (below).

### Phase-based cortical synchrony is affected by prematurity

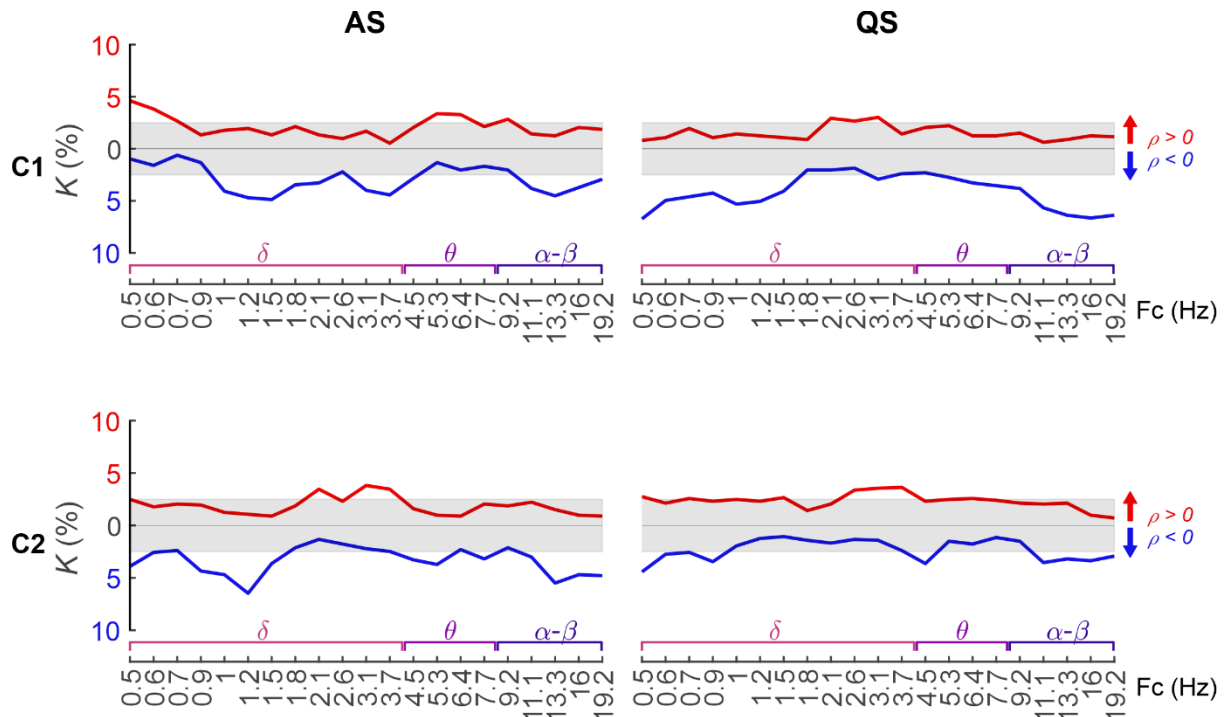

717

718

719 **Figure 3—figure supplement 2. Absence of correlation between cortical PPC strengths**

720 **and early neurological performance in healthy controls.** Network density ( $K$ ) of PPC

721 correlation related to the neurological assessment scores C1 and C2 as a function of

722 frequency band in the HC cohort (Spearman, two-tailed test, with conceptional age as a

723 covariate, and  $\alpha = 0.05$ ). The FDR ( $q = 0.05$ ) boundaries are depicted as a grey shaded area.

724 Colour coding represents the polarity of the correlation (red:  $\rho \geq 0$ , blue  $\rho < 0$ ). Analysis of the

725 HC group shows an absence of wider network patterns that would correlate positively to either

726 of the neurological scores. There are some networks at low frequencies with negative

727 correlation to C1 and C2 during AS (peak at  $F_c = 1.2$ – $1.5$  Hz) and some networks at low and

728 high frequencies with negative correlation to C1 during QS (peaks at  $F_c = 0.5$  Hz and  $F_c = 16$

729 Hz).

### Phase-based cortical synchrony is affected by prematurity

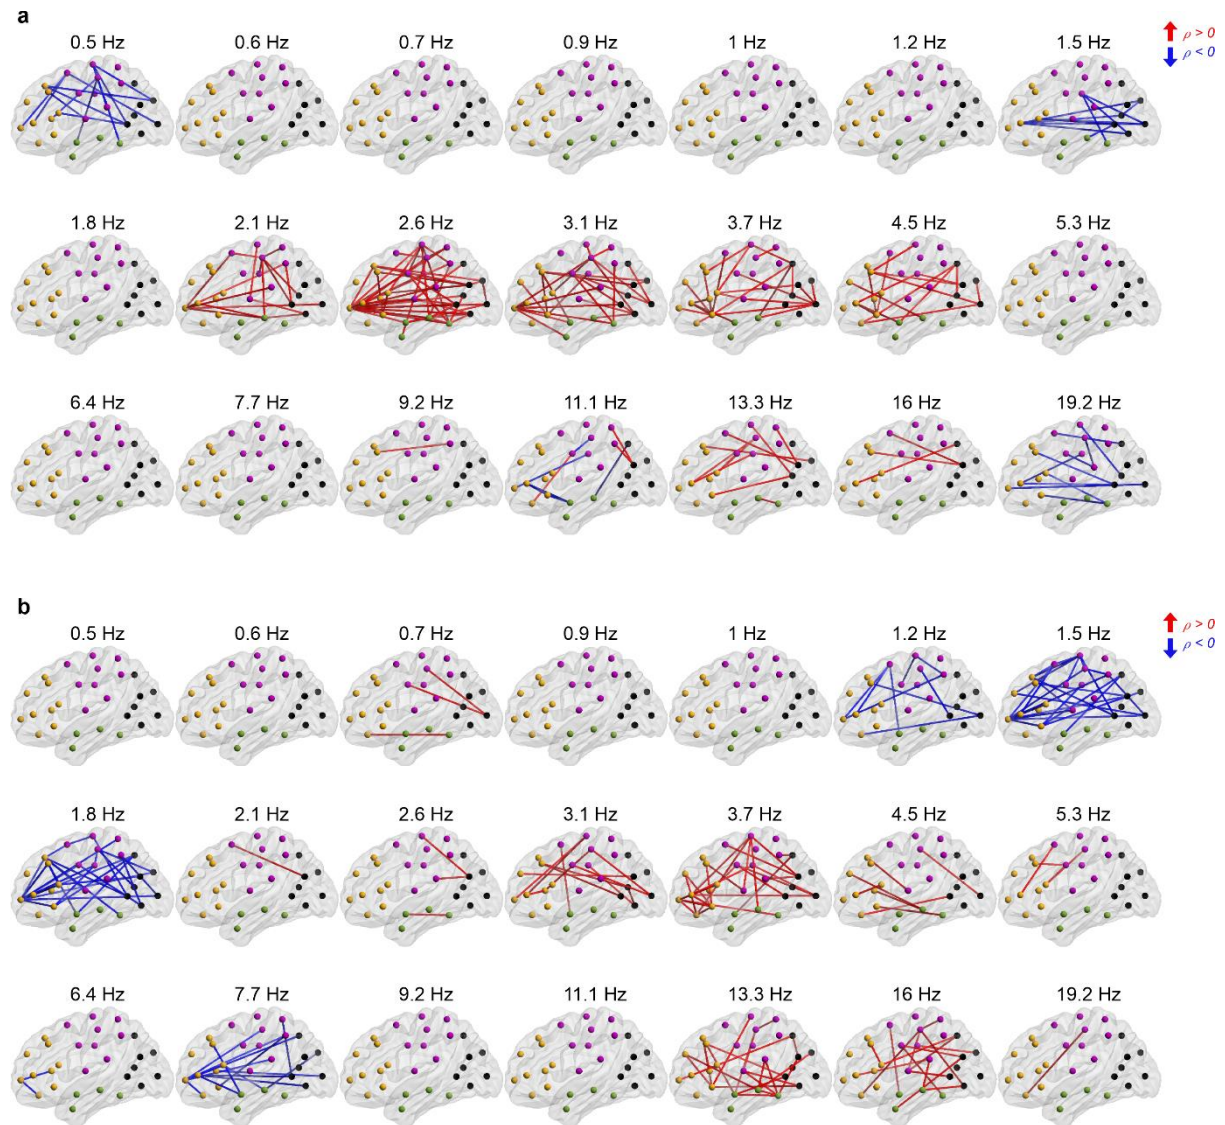

730

731

732

733 Figure 3—figure supplement 3. **The frequency-specific PPC correlation networks to C1**

734 **neurological outcomes.** 3-dimensional visualizations depicting the correlation of connection

735 strength to C1 scores (Spearman, two-tailed test, with conceptional age as a covariate, and  $\alpha$

736 = 0.05) on all investigated frequency bands in AS (a) and QS (b) in EP infants at term-

737 equivalent age. The edges displayed in the figure passed FDR correction ( $q = 0.05$ ). Red

738 networks indicate positive correlation (Spearman  $\rho \geq 0$ ), whereas blue connections express

739 negative correlation (Spearman  $\rho < 0$ ).

## Phase-based cortical synchrony is affected by prematurity

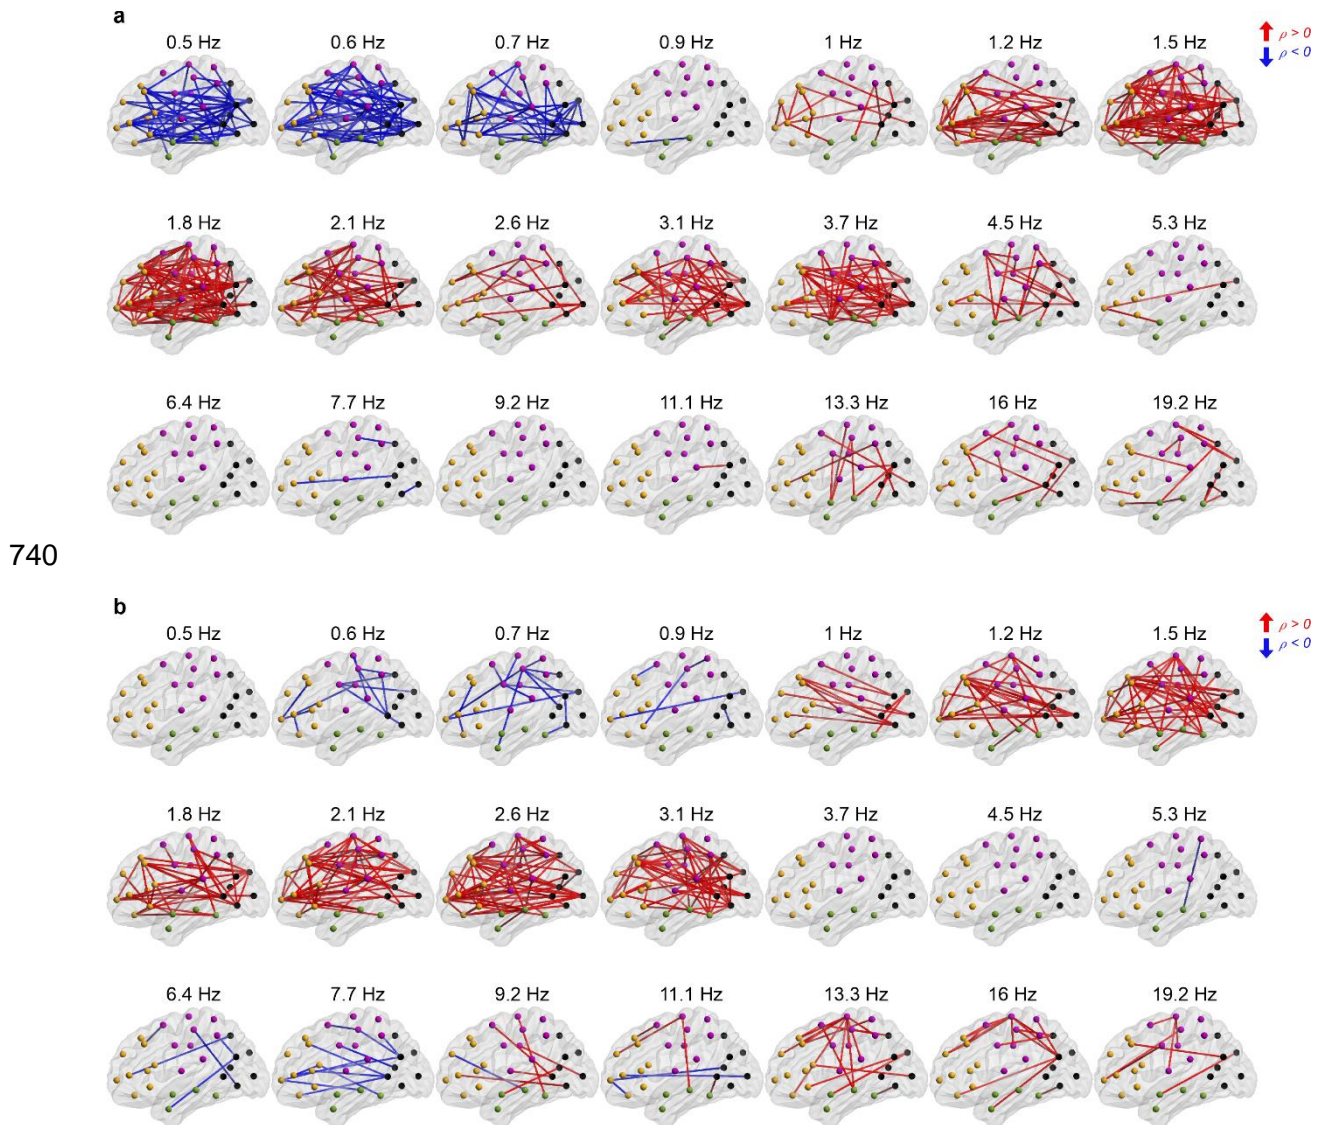

743 Figure 3—figure supplement 4. **The frequency-specific PPC correlation networks to C2**  
744 **neurological outcomes.** 3-dimensional visualizations depicting the correlation of connection  
745 strength to C2 scores (Spearman, two-tailed test, with conceptual age as a covariate, and  $\alpha$   
746 = 0.05) on all investigated frequency bands in AS (a) and QS (b) in EP infants at term-  
747 equivalent age. The edges displayed in the figure passed FDR correction ( $q = 0.05$ ). Red  
748 networks indicate positive correlation (Spearman  $\rho \geq 0$ ), whereas blue connections express  
749 negative correlation (Spearman  $\rho < 0$ ).

Phase-based cortical synchrony is affected by prematurity

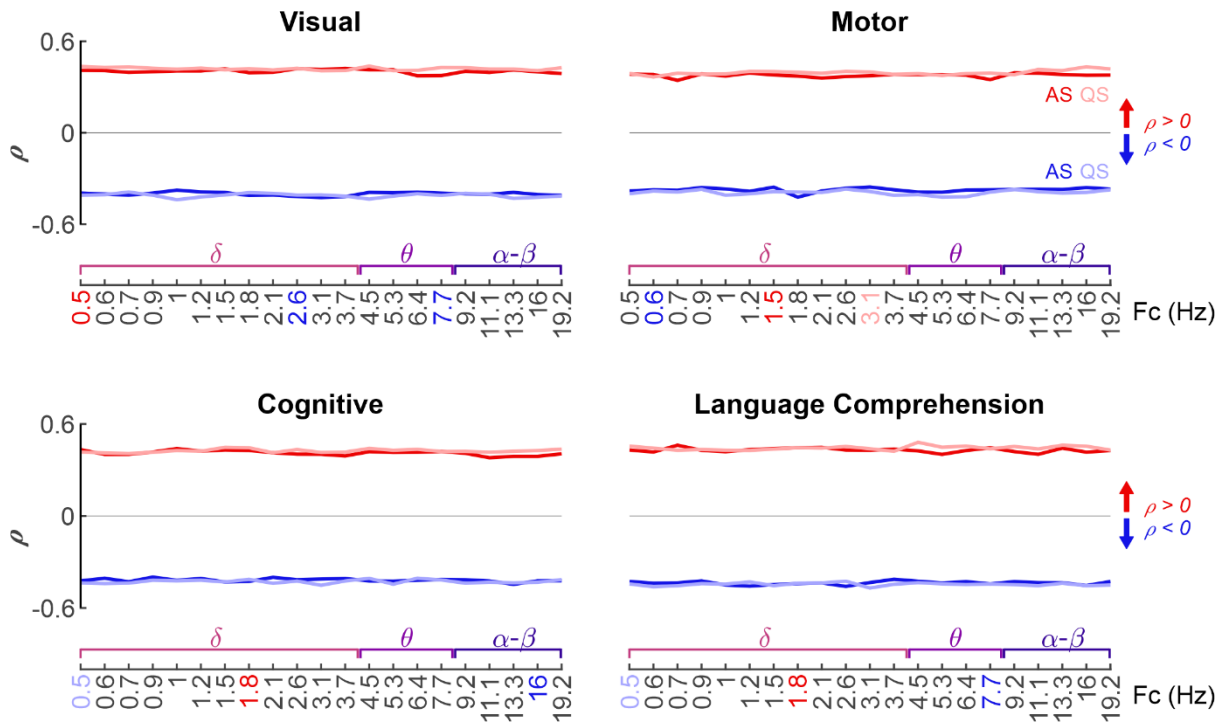

750

751

752 Figure 4—figure supplement 1. **Effect size of PPC networks depicting long-term**

753 **neurocognitive correlation.** The effect size was computed as the mean Spearman (two-

754 tailed test, with conceptional age as a covariate, and  $\alpha = 0.05$ )  $p$ -value for the significant

755 networks of each frequency band. The colors show the sign of the correlation ( $\rho \geq 0$ : red and

756  $\rho < 0$ : blue). The effect size values are presented separately for active sleep (AS, dark hues)

757 and quiet sleep (QS, light hues) as well as for the neurocognitive scores Griffiths visual (upper

758 left), Griffiths motor (upper right), Bayley cognitive (lower left), and Bayley language

759 comprehension (lower right).

## Phase-based cortical synchrony is affected by prematurity

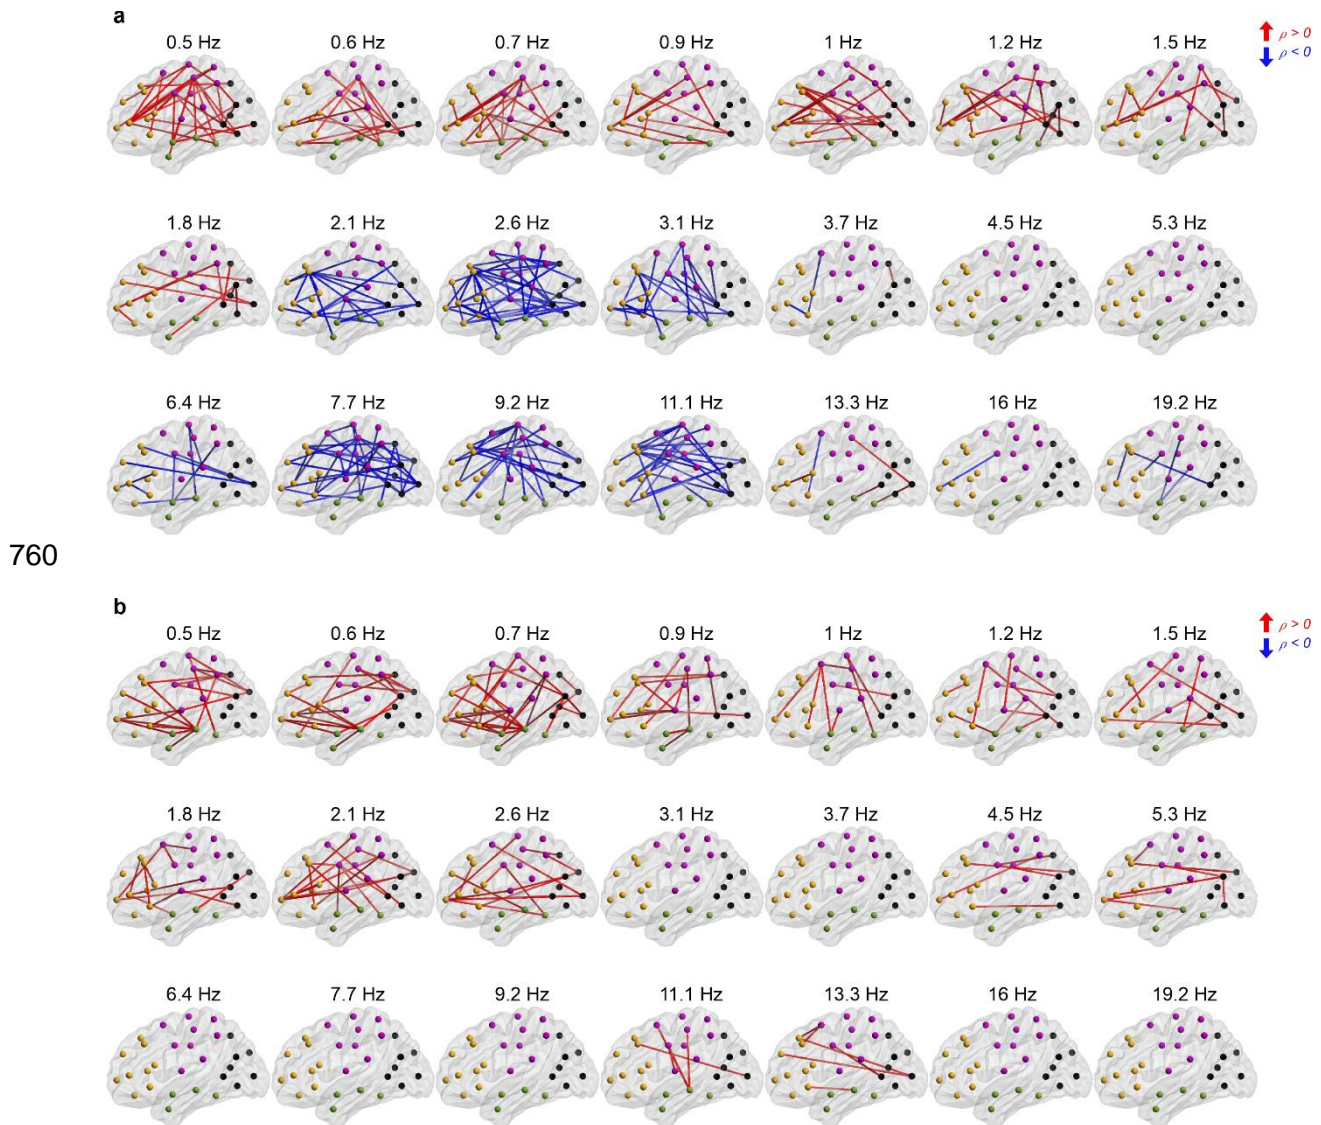

763 **Figure 4—figure supplement 2. The frequency-selective PPC fingerprint networks**  
764 **reflecting visual performance at 2 years of age.** Spatial visualizations of PPC edge strength  
765 correlation to Griffiths visual scores (Spearman, two-tailed test, with conceptual age as a  
766 covariate,  $\alpha = 0.05$ ) over all examined frequency bands in AS (a) and QS (b) in the EP cohort  
767 at 2 years of age. The presented connections survived multiple comparisons correction with  
768 FDR ( $q = 0.05$ ). Colour coding represents the sign of correlation (red:  $\rho \geq 0$ , blue  $\rho < 0$ ).

## Phase-based cortical synchrony is affected by prematurity

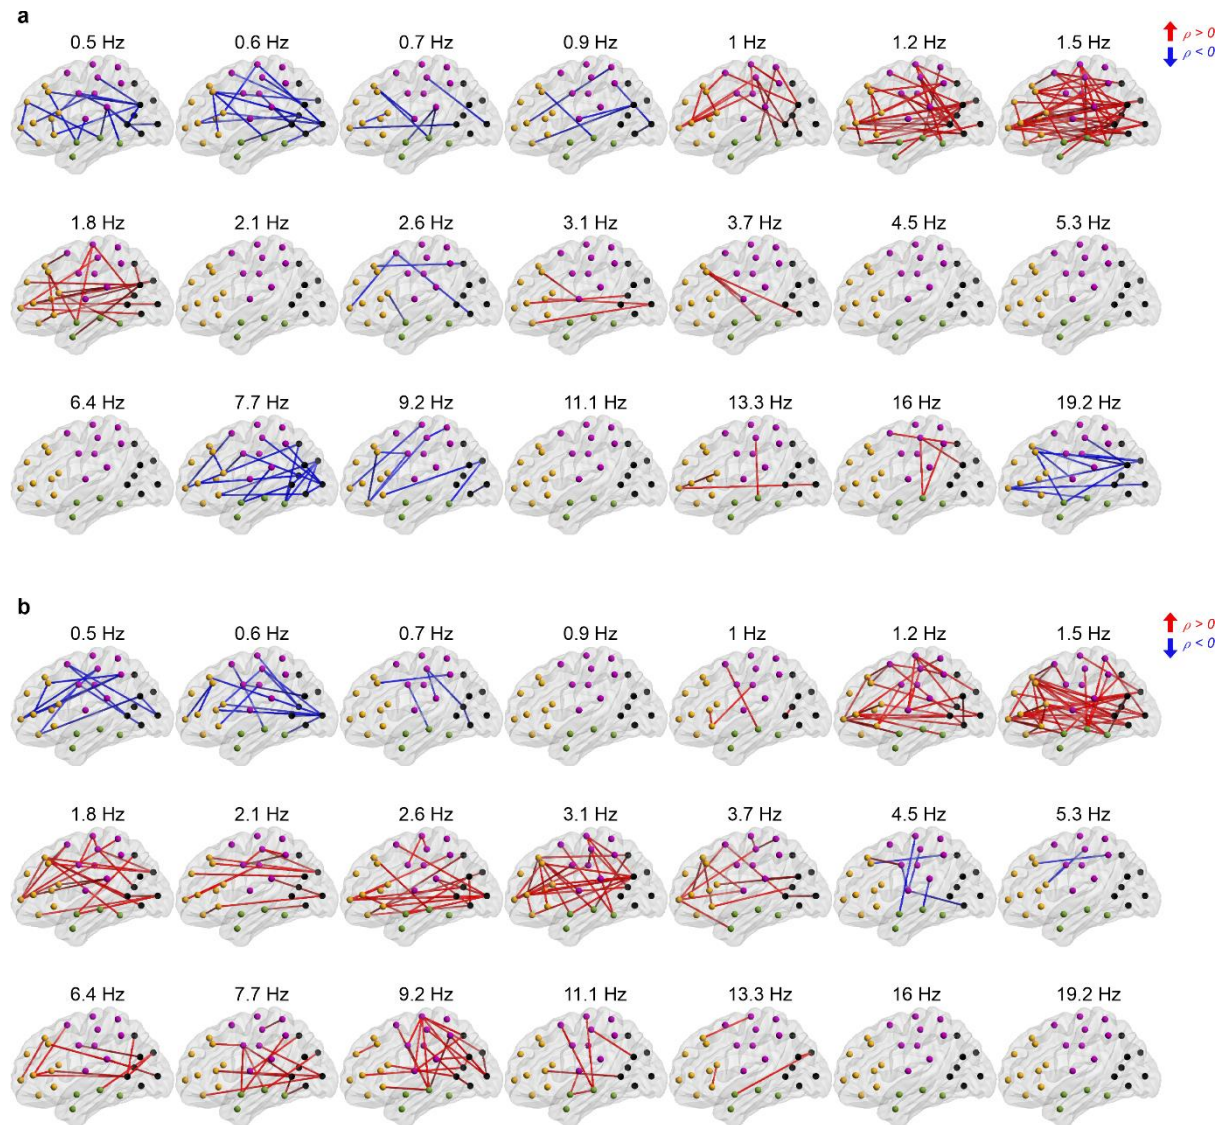

770

771

772 **Figure 4—figure supplement 3. The frequency-selective PPC fingerprint networks**

773 **reflecting motor performance at 2 years of age.** Spatial visualizations of PPC edge strength

774 correlation to Griffiths motor scores (Spearman, two-tailed test, with conceptual age as a

775 covariate,  $\alpha = 0.05$ ) over all examined frequency bands in AS (a) and QS (b) in the EP cohort

776 at 2 years of age. The presented connections survived multiple comparisons correction with

777 FDR ( $q = 0.05$ ). Colour coding represents the sign of correlation (red:  $\rho \geq 0$ , blue  $\rho < 0$ ).

## Phase-based cortical synchrony is affected by prematurity

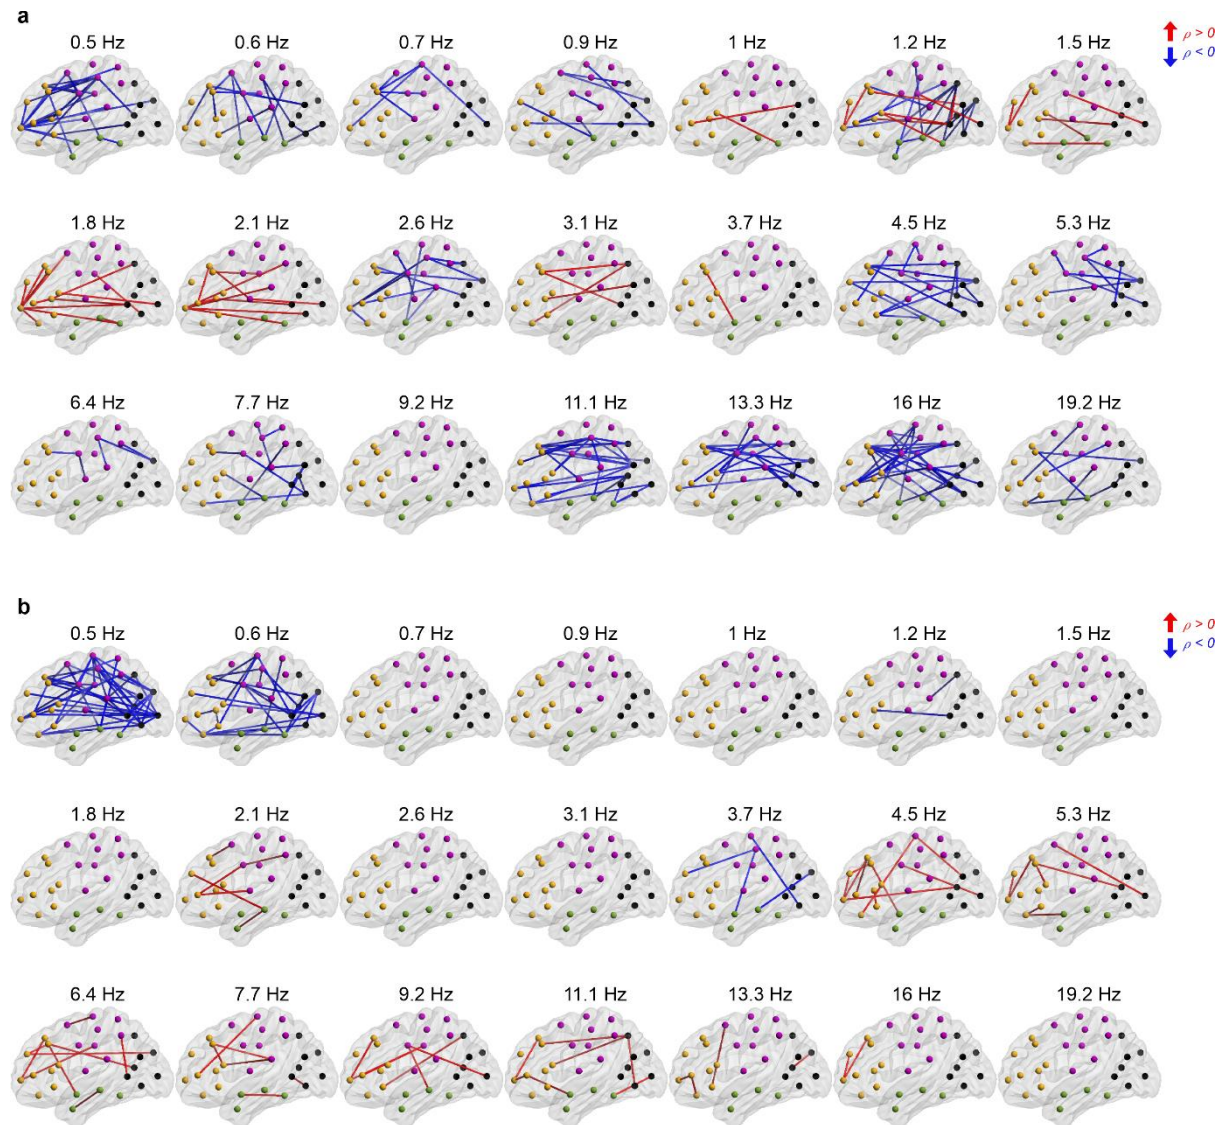

778

779

780

781 **Figure 4—figure supplement 4. The frequency-selective PPC fingerprint networks**

782 **reflecting cognitive performance at 2 years of age.** Spatial visualizations of PPC edge

783 strength correlation to Bayley cognitive scores (Spearman, two-tailed test, with conceptual

784 age as a covariate, and 0.05) over all examined frequency bands in AS (a) and QS (b) in the

785 EP cohort at 2 years of age. The presented connections survived multiple comparisons

786 correction with FDR ( $q = 0.05$ ). Colour coding represents the sign of correlation (red:  $\rho \geq 0$ ,

787 blue  $\rho < 0$ ).



## Phase-based cortical synchrony is affected by prematurity

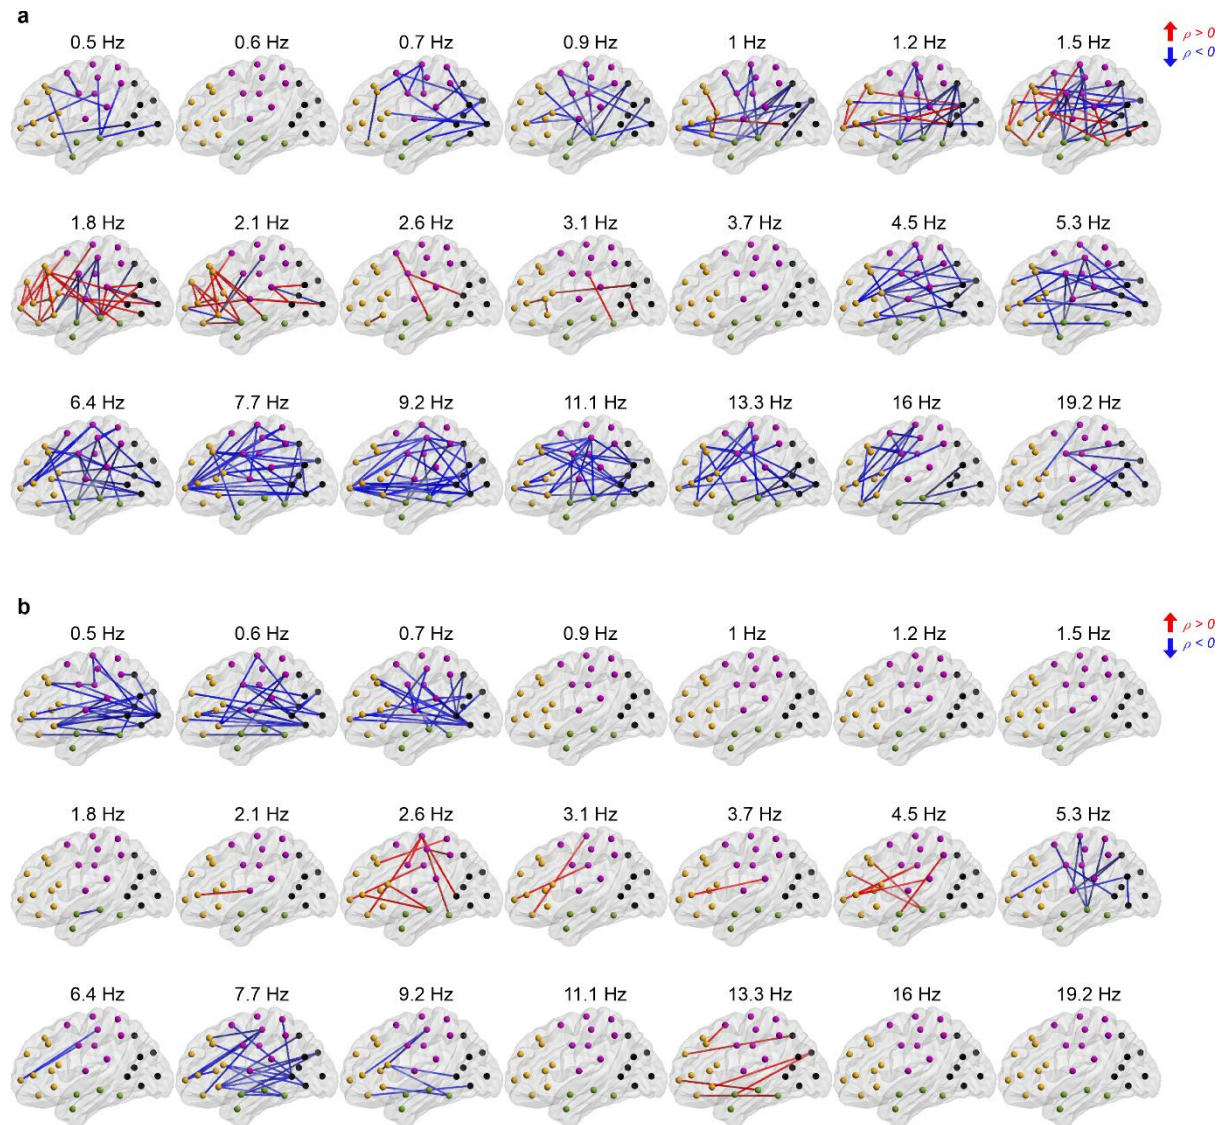

789

790

791 **Figure 4—figure supplement 5. The frequency-selective PPC fingerprint networks**  
792 **reflecting language comprehension at 2 years of age.** Spatial visualizations of PPC edge  
793 strength correlation to Bayley language comprehension scores (Spearman, two-tailed test,  
794 with conceptional age as a covariate,  $\alpha = 0.05$ ) over all examined frequency bands in AS (a)  
795 and QS (b) in the EP cohort at 2 years of age. The presented connections survived multiple  
796 comparisons correction with FDR ( $q = 0.05$ ). Colour coding represents the sign of correlation  
797 (red:  $\rho \geq 0$ , blue  $\rho < 0$ ).
